# Supplementary material for: A trifunctional self-immolative spacer enables drug release with two non-sequential enzymatic cleavages
Source: Royal Society of Chemistry journal article supplement (doi:10.1039/d1cc02895b), 2021-01-01

## Electronic Supplementary Information (ESI)

### A Trifunctional Self-Immolative Spacer Enables Drug Release with Two Non-Sequential Enzymatic Reactions

Alberto Dal Corso,\* Simone Arosio, Noemi Arrighetti, Paola Perego, Laura Belvisi, Luca Pignataro, and Cesare Gennari\*

#### Table of Contents

|                                                                                                      |            |
|------------------------------------------------------------------------------------------------------|------------|
| <u>Synthetic Procedures</u>                                                                          | <u>S2</u>  |
| Materials and Methods                                                                                | S2         |
| General Procedures                                                                                   | S2         |
| Synthesis of <b>Sp(1-3)-CMR</b>                                                                      | S3         |
| Synthesis of <b>Sp2-CPT</b> and <b>Sp3-CPT</b>                                                       | S6         |
| Synthesis of Camptothecin Prodrugs <b>5</b> and <b>6</b>                                             | S8         |
| <u>Enzyme-free Carbamate Cleavage Studies</u>                                                        | <u>S13</u> |
| Experimental Procedure                                                                               | S13        |
| HPLC Data – Coumarin Carbamates                                                                      | S14        |
| HPLC Data – CPT Prodrugs                                                                             | S17        |
| <u>Carbamate Cleavage Studies in the presence/absence of Phosphatase</u>                             | <u>S20</u> |
| Experimental Procedure                                                                               | S20        |
| HPLC Data – Coumarin Carbamates                                                                      | S21        |
| HPLC Data – CPT Prodrugs                                                                             | S22        |
| <u>Camptothecin Release from Prodrug <b>5</b> in the presence/absence of Phosphatase and Trypsin</u> | <u>S22</u> |
| Experimental Procedure                                                                               | S23        |
| <u>Cell Growth Inhibition Assays</u>                                                                 | <u>S24</u> |
| Experimental Procedure                                                                               | S24        |
| <u>Supplementary Figures</u>                                                                         | <u>S25</u> |
| <u>Appendix</u>                                                                                      | <u>S29</u> |
| NMR Spectra                                                                                          | S29        |
| HPLC traces of purified prodrugs <b>5</b> and <b>6</b>                                               | S37        |

## Synthetic Procedures

### Materials and Methods

All manipulations requiring anhydrous conditions were carried out in flame-dried glassware, with magnetic stirring and under a nitrogen atmosphere. All commercially available reagents were used as received. Anhydrous solvents were purchased from commercial sources and withdrawn from the container by syringe, under a slight positive pressure of nitrogen. The reactions were monitored by analytical thin-layer chromatography (TLC) using silica gel 60 F254 pre-coated glass plates (0.25 mm thickness). Visualization was accomplished by irradiation with a UV lamp and/or staining with a ceric ammonium molybdate solution or ninhydrin. Flash column chromatography was performed according to the method of Still and co-workers<sup>1</sup> using Chromagel 60 ACC (40-63  $\mu$ m) silica gel. Proton chemical shifts are reported in ppm ( $\delta$ ) with the solvent reference relative to tetramethylsilane (TMS) employed as the internal standard ( $\text{CDCl}_3$   $\delta$  = 7.26 ppm;  $\text{CD}_2\text{Cl}_2$ ,  $\delta$  = 5.32 ppm;  $[\text{D}]_6$ -DMSO,  $\delta$  = 2.50 ppm;  $\text{CD}_3\text{OD}$ ,  $\delta$  = 3.33 ppm,  $[\text{D}]_8$ -THF  $\delta$  = 3.58 ppm, 1.73 ppm). The following abbreviations are used to describe spin multiplicity: s = singlet, d = doublet, t = triplet, q = quartet, m = multiplet, bs = broad signal, dd = doublet of doublet, ddd = doublet of doublet of doublet, ddt = doublet of doublet of triplet. Carbon NMR spectra were recorded on a spectrometer operating at 100.63 MHz, with complete proton decoupling. Carbon chemical shifts are reported in ppm ( $\delta$ ) relative to TMS with the respective solvent resonance as the internal standard ( $\text{CDCl}_3$ ,  $\delta$  = 77.16 ppm;  $\text{CD}_2\text{Cl}_2$ ,  $\delta$  = 54.00 ppm;  $\text{d}_6$ -DMSO,  $\delta$  = 39.51 ppm;  $\text{CD}_3\text{OD}$ ,  $\delta$  = 49.05 ppm;  $[\text{D}]_8$ -THF  $\delta$  = 67.57 ppm, 25.37 ppm). HPLC purifications were performed on Dionex Ultimate 3000 equipped with Dionex RS Variable Wavelength Detector (column: Atlantis Prep T3 OBDTM 5  $\mu$ m 19 x 100 mm; flow 10 ml/min unless stated otherwise). HPLC analysis of carbamate stability was performed on a Waters 515 HPLC pumps equipped with 996 photodiode array detector and Waters Atlantis T3 - 5  $\mu$ m - 4.6 x 100 mm column. HPLC-MS and high-resolution mass spectrometry analysis (HRMS, 4 decimal places) were performed on a Q-TOF Synapt G2-Si instrument available at the MS facility of the Unitech COSPECT at the University of Milan. Low resolution mass spectra (MS, 1 and 2 decimal places) were recorded on a Thermo Scientific LCQ Fleet Ion Trap Mass Spectrometer (ESI source). Carbonate **Sp1-CPT** was prepared following a published procedure.<sup>2</sup>

### General Procedures

#### General procedure A for Boc deprotection

To an ice-cold  $\text{CH}_2\text{Cl}_2$  solution of the *N*-Boc-protected compound, half volume of TFA was added and the mixture was stirred at r.t. for 1 h. The solvent was evaporated and then for two times  $\text{CH}_2\text{Cl}_2$  was added to the residue followed by evaporation under vacuum, to afford the amine TFA salt.

---

<sup>1</sup> W. C. Still, M. Kahn, A. Mitra, *J. Org. Chem.* 1978, **43**, 2923.

<sup>2</sup> E. Riva, D. Comi, S. Borrelli, F. Colombo, B. Danieli, J. Borlak, L. Evensen, J. B. Lorens, G. Fontana, O. M. Gia, L. Dalla Via D. Passarella, *Bioorg. Med. Chem.* 2010, **18**, 8660.

## Synthesis of Sp(1-3)-CMR

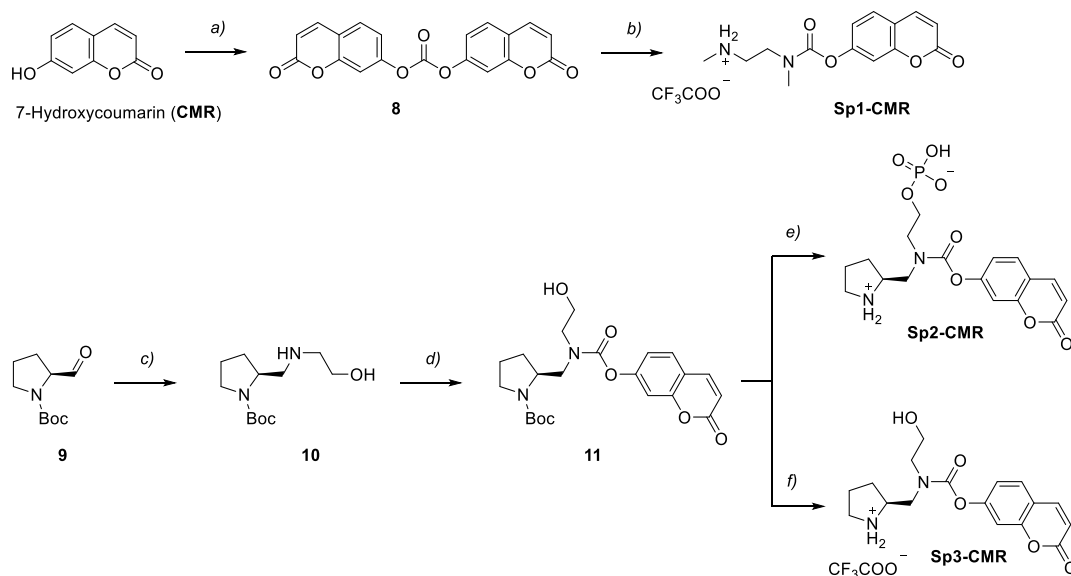

**Scheme S1.** REAGENTS AND CONDITIONS: a) Triphosgene,  $i\text{Pr}_2\text{NEt}$ , THF,  $\text{CH}_2\text{Cl}_2$ , 0 °C, 1.5 h; b) [1] (*N*-Boc)-*N,N*-dimethylethylenediamine, DMF, 55 °C, 3h; [2] TFA/  $\text{CH}_2\text{Cl}_2$ , r.t. 1 h; c) Ethanolamine,  $\text{NaBH}(\text{OAc})_3$ , AcOH,  $\text{CH}_2\text{Cl}_2$ , r.t. 16 h; d) **8**,  $i\text{Pr}_2\text{NEt}$ , DMAP,  $\text{CH}_2\text{Cl}_2/\text{DMF}$ , 55 °C, 3h; e) [1] di-*tert*-butyl *N,N*-diisopropylphosphoramidite, 1*H*-tetrazole,  $\text{CH}_2\text{Cl}_2$ , r.t. 1 h; [2] *m*CPBA, 0 °C to r.t. 1 h; [3] TFA/  $\text{CH}_2\text{Cl}_2$ , r.t. 1 h; f) TFA/  $\text{CH}_2\text{Cl}_2$ , r.t. 1 h.

### Bis-(7-OH)Coumarin Carbonate (**8**)

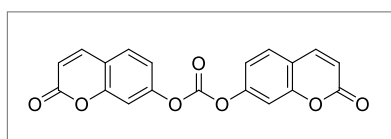

$\text{C}_{19}\text{H}_{10}\text{O}_7$   
MW: 350,28 g · mol<sup>-1</sup>

7-Hydroxy coumarin (500 mg, 3.10 mmol, 1.4 equiv.) was suspended in dry THF (18 ml) and cooled to 0 °C under a nitrogen atmosphere. Dry  $i\text{Pr}_2\text{NEt}$  (1.9 ml, 11.05 mmol, 5 equiv.) was added. Triphosgene (657 mg, 2.21 mmol, 1 equiv.) was dissolved in dry  $\text{CH}_2\text{Cl}_2$  (2 ml) and slowly added to the stirring solution with a syringe, within 5 minutes. The mixture was stirred at 0 °C for 1.5 h, followed by addition of a 0.1 M HCl aq. solution (20 ml). The mixture was stirred for 5 min, the solid was collected through a Buchner filter and washed with a 0.1 M HCl aq. solution. The solid was collected from the filter using MeCN. The resulting suspension was concentrated and volatiles were removed under high vacuum, affording **8** as a pale-brown, poorly soluble solid, which was used in the next synthetic steps without further purification (ca. 500 mg, Y.: quant.).

Mp: 287-292 °C; IR peaks: 1761.65, 1748.16, 1725.98, 1624.73, 1426.10, 1399.10, 1332.57, 1280.50, 1255.43, 1229.40, 1189.86, 1113.69, 1096.33, 985.45, 974.84, 890.95, 876.49, 841.78, 822.49, 756.92, 689.43, 677.86, 613.25 cm<sup>-1</sup>.

## Sp1-CMR

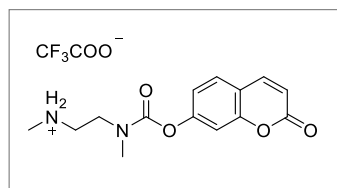

$C_{14}H_{16}N_2O_4$   
MW: 276,29 g · mol<sup>-1</sup> + TFA

Carbonate **8** (25 mg, 71 μmol, 1 equiv.) was suspended in dry DMF (2 ml) and cooled to 0 °C under a nitrogen atmosphere. (*N*-Boc)*N,N'*-dimethylethylenediamine<sup>3</sup> (40 mg, 214 μmol, 3 equiv.) was added. The mixture was warmed to 55 °C and stirred for 3 h. The solvent was removed under high vacuum, then the crude was dissolved in CH<sub>2</sub>Cl<sub>2</sub> (1 ml) and treated following General Procedure A. After solvent removal, the crude material was purified by HPLC [eluent A: H<sub>2</sub>O + 0.1% TFA; eluent B: MeCN, ramp from 5% B (at min 0.5) to 50% B (at min 8.5), *t<sub>R</sub>* (product): 6.9 min]. The purified product was then lyophilized to give **Sp1-CMR** as a white solid (23 mg, 82% over two steps).

<sup>1</sup>H NMR (400 MHz, d<sub>6</sub>-DMSO + D<sub>2</sub>O) δ 8.04 (d, *J* = 9.6 Hz, 1H), 7.73 (d, *J* = 8.5 Hz, 1H), 7.30 (bs, 1H), 7.19 (dd, *J* = 8.5, 2.2 Hz, 1H), 6.44 (d, *J* = 9.6 Hz, 1H), 3.70 (m, 2H, rotamer A), 3.58 (m, 2H, rotamer B), 3.19 (m, 2H, rotamer A), 3.16 (m, 2H, rotamer B), 3.05 (s, 3H, rotamer A), 2.93 (s, 3H, rotamer B), 2.62 (s, 3H, rotamer A), 2.60 (s, 3H, rotamer B) ppm. HRMS (ESI) *m/z* calcd. for [C<sub>14</sub>H<sub>17</sub>N<sub>2</sub>O<sub>4</sub>]<sup>+</sup>: 277,1183 [M+H]<sup>+</sup>, found: 277,1184.

## Boc-Pro-OH (**10**)

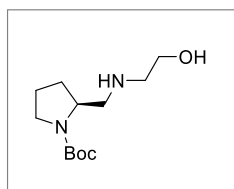

$C_{12}H_{24}N_2O_3$   
MW: 244,34 g · mol<sup>-1</sup>

(L)-Boc-Proinal (**9**, 190 μl, 1 mmol, 1 equiv.) was dissolved in dry CH<sub>2</sub>Cl<sub>2</sub> (20 ml) under a nitrogen atmosphere and acetic acid (2 ml) was added. Ethanolamine (182 μl, 3 mmol, 3 equiv.), followed by solid NaBH(OAc)<sub>3</sub> (848 mg, 4 mmol, 4 equiv.) were added and the mixture was stirred overnight at r.t.. The mixture was transferred into a separating funnel and diluted with CH<sub>2</sub>Cl<sub>2</sub> (20 ml). A 10% aq. solution of Na<sub>2</sub>CO<sub>3</sub> (40 ml) was added. The emulsion was rapidly shaken in the open funnel and flushed with nitrogen. The pH was increased up to 12 with a 2 M NaOH aq. solution (10 ml). The emulsion was shaken, the phases were separated and the aqueous phase was extracted with CH<sub>2</sub>Cl<sub>2</sub> (3 × 40 ml). The collected organic phases were washed with brine (1 × 10 ml), dried and concentrated, affording **10** as a pale-yellow oil (240 mg, quant.), which was used in the next steps without further purification.

<sup>1</sup>H NMR (400 MHz, MeOD) δ 3.89 (m, 1H), 3.65 (t, *J* = 5.5 Hz, 2H), 3.40 – 3.33 (m, 2H), 2.81 (m, 1H), 2.74 (t, *J* = 5.5 Hz, 2H), 2.58 (dd, *J* = 11.8, 7.8 Hz, 1H), 2.03 – 1.79 (m, 4H), 1.47 (s, 9H) ppm; <sup>13</sup>C NMR (101 MHz, MeOD) δ 156.9, 81.3 (rotamer A), 80.8 (rotamer B), 61.4, 58.2, 53.5, 52.5, 47.9, 47.4 (rotamer A), 30.5 (rotamer B), 30.1 (rotamer A), 28.8 (rotamer B), 24.6 (rotamer A), 23.8 (rotamer B) ppm; <sup>13</sup>C NMR (101 MHz, MeOD) δ 156.9, 81.3, 80.8, 61.4, 58.2, 53.5, 52.5, 47.9, 47.4, 30.5, 30.1, 28.8, 24.6, 23.8 ppm.

### Boc-Sp3-CMR (11)

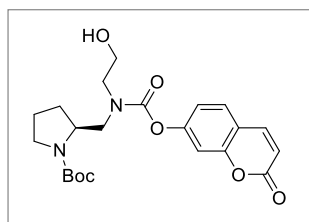

$C_{22}H_{28}N_2O_7$   
MW: 432,47 g · mol<sup>-1</sup>

Amine **10** (81 mg, 0.23 mmol, 1 equiv.) was suspended in dry CH<sub>2</sub>Cl<sub>2</sub> (5 ml) and cooled to 0 °C under a nitrogen atmosphere. ADC290 (80 mg, 0.32 mmol, 1.4 equiv.) and *i*Pr<sub>2</sub>NEt (200 µl, 1.15 mmol, 5 equiv.) were added. The mixture was warmed to r.t., then DMAP (10 mg, 0.08 mmol, 0.3 equiv.) and dry DMF (2 ml) were added. The mixture was warmed to 55 °C. After ca. 3 h the mixture became limpid. The solvent was removed under high vacuum, then the crude was dissolved in CH<sub>2</sub>Cl<sub>2</sub> (100 ml) and washed with KHSO<sub>4</sub> aq. 1 M (2 × 20 ml) and brine (1 × 20 ml), dried and concentrated. The crude mixture was purified by flash chromatography (gradient from 1% MeOH in CH<sub>2</sub>Cl<sub>2</sub> to 2% MeOH in CH<sub>2</sub>Cl<sub>2</sub>), obtaining **11** as a pale-yellow solid (40 mg, 40%).

*R*<sub>f</sub>: 0.4 (95:5 CH<sub>2</sub>Cl<sub>2</sub>/MeOH). <sup>1</sup>H NMR (400 MHz, MeOD) δ 7.95 (d, *J* = 9.6 Hz, 1H), 7.65 (dd, *J* = 8.4, 2.1 Hz, 1H), 7.27 – 7.11 (m, 2H), 6.40 (d, *J* = 9.6 Hz, 1H), 4.27 (m, 1H), 3.84 – 3.73 (m, 2H), 3.69 – 3.33 (m, 6H), 2.05 – 1.79 (m, 4H), 1.47 (s, 9H) ppm.

### Sp2-CMR

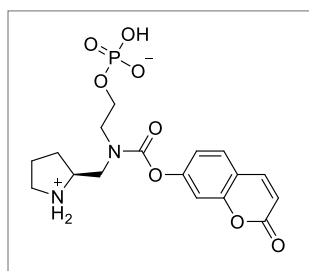

$C_{17}H_{21}N_2O_8P$   
MW: 412,33 g · mol<sup>-1</sup>

Alcohol **11** (13 mg, 30 µmol, 1 equiv.) was dissolved in dry CH<sub>2</sub>Cl<sub>2</sub> (3 ml) under a nitrogen atmosphere. A 0.45 M 1*H*-tetrazole solution in MeCN (200 µl, 90 µmol, 3 equiv.) and di-*tert*-butyl *N,N*-diisopropylphosphoramidite (28 µl, 90 µmol, 3 equiv.) were added and the mixture was stirred for 1.5 h at r.t.. The mixture was then cooled to 0 °C and *m*CPBA (18 mg, 105 µmol, 3.5 equiv.) was added. The mixture was warmed to r.t. and stirred for 1 h. Volatiles were removed under vacuum and the solid material was dissolved in CH<sub>2</sub>Cl<sub>2</sub> (2 ml) and cooled to 0 °C. Trifluoroacetic acid (1 ml) was added and the mixture was stirred 45 min. at r.t., concentrated and purified by HPLC [eluent A: H<sub>2</sub>O + 0.1% TFA; eluent B: MeCN, ramp from 5% B (at min 0.5) to 50% B (at min 8.5), *t*<sub>R</sub> (product): 6.7 min]. The purified product was then lyophilized to give **Sp2-CMR** as a white solid (20 mg, quant. over three steps).

MS (ESI) *m/z* calcd. for [C<sub>17</sub>H<sub>22</sub>N<sub>2</sub>O<sub>8</sub>P]<sup>+</sup>: 413.11 [M+H]<sup>+</sup>, found: 412.97. HRMS (ESI) *m/z* calcd. for [C<sub>17</sub>H<sub>22</sub>N<sub>2</sub>O<sub>8</sub>P]<sup>+</sup>: 413,1108 [M+H]<sup>+</sup>, found: 413,1113.

### Sp3-CMR

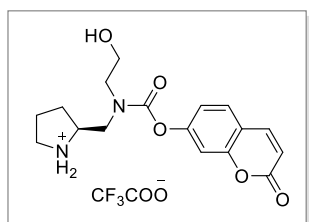

$C_{17}H_{20}N_2O_5$   
MW: 332,35 g · mol<sup>-1</sup> + TFA

Compound **11** (13 mg, 30 µmol, 1 equiv.) was dissolved in CH<sub>2</sub>Cl<sub>2</sub> (1 ml) and treated following General Procedure A. After solvent removal, the crude material was purified by HPLC [eluent A: H<sub>2</sub>O + 0.1% TFA; eluent B: MeCN, ramp from 5% B (at min 0.5) to 50% B (at min 8.5), *t*<sub>R</sub> (product): 6.7 min]. The purified product was then lyophilized to give **Sp3-CMR** as a white solid (12 mg, quant.).

HRMS (ESI) *m/z* calcd. for [C<sub>17</sub>H<sub>21</sub>N<sub>2</sub>O<sub>5</sub>]<sup>+</sup>: 333,1445 [M+H]<sup>+</sup>, found: 333,1457.

## Synthesis of Sp2-CPT and Sp3-CPT

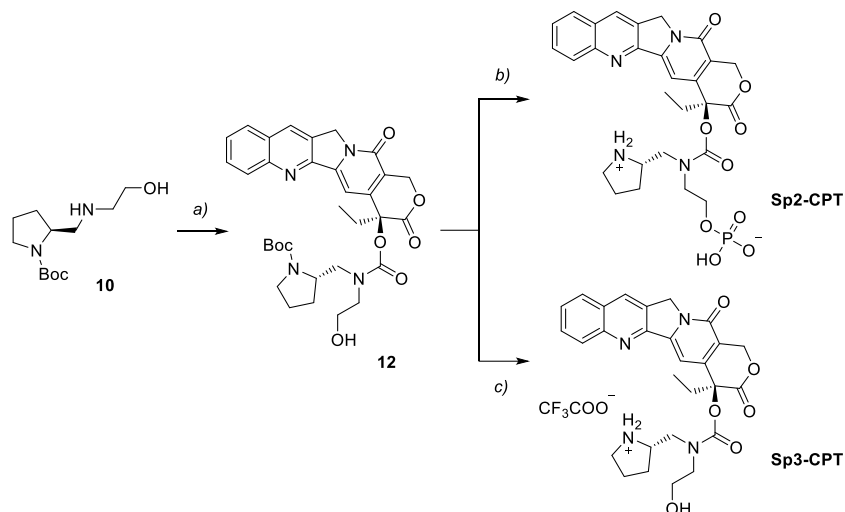

**Scheme S2.** REAGENTS AND CONDITIONS: a) **CPT-PNP**, *i*Pr<sub>2</sub>NEt, DMF, r.t. 16 h; b) [1] di-*tert*-butyl *N,N*-diisopropylphosphoramidite, 1*H*-tetrazole, CH<sub>2</sub>Cl<sub>2</sub>, r.t. 1 h; [2] *m*CPBA, 0 °C to r.t. 1 h; [3] TFA/CH<sub>2</sub>Cl<sub>2</sub>, r.t. 1 h; c) TFA/CH<sub>2</sub>Cl<sub>2</sub>, r.t. 1 h.

### Boc-Sp3-CPT (**12**)

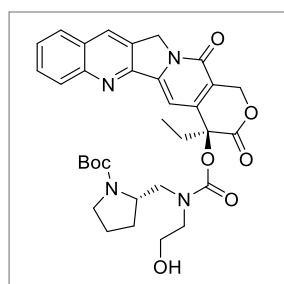

C<sub>33</sub>H<sub>38</sub>N<sub>4</sub>O<sub>8</sub>  
MW: 618,69 g • mol<sup>-1</sup>

Camptothecin-*p*-nitrophenyl carbonate (**CPT-PNP**,<sup>[2]</sup> 50 mg, 93 μmol, 1 equiv.) was dissolved in dry DMF (1 ml) and cooled to 0 °C under a nitrogen atmosphere. A solution of amine **10** (33 mg, 0.14 mmol, 1.5 equiv.) in dry DMF (1 ml) and *i*Pr<sub>2</sub>NEt (8 μl, 93 μmol, 1 equiv.) were added to the cooled **CPT-PNP** solution. The mixture was warmed to r.t. and stirred overnight. The solvent was removed under high vacuum, and the crude product was purified by flash chromatography (dry load, gradient from 1% MeOH in CH<sub>2</sub>Cl<sub>2</sub> to 10% MeOH in CH<sub>2</sub>Cl<sub>2</sub>), obtaining **SA05** as a pale-yellow solid (56 mg, 97%).

MS (ESI) *m/z* calcd. for [C<sub>33</sub>H<sub>38</sub>N<sub>4</sub>NaO<sub>8</sub>]<sup>+</sup>: 641.26 [M+Na]<sup>+</sup>, found: 641.37; *m/z* calcd. for [C<sub>33</sub>H<sub>37</sub>N<sub>4</sub>O<sub>8</sub>]<sup>-</sup>: 617.26: [M-H]<sup>-</sup>, found: 617.34.

### Sp2-CPT

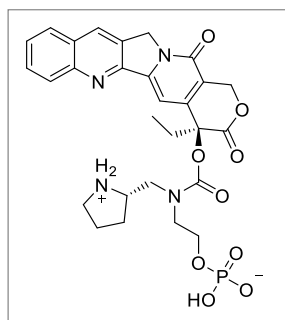

$C_{28}H_{31}N_4O_9P$   
MW: 598,55 g · mol<sup>-1</sup>

Alcohol **12** (10 mg, 16 μmol, 1 equiv.) was dissolved in dry CH<sub>2</sub>Cl<sub>2</sub> (1 ml) under a nitrogen atmosphere. 1*H*-tetrazole (106 μl of a 0.45 M solution in anhydrous MeCN, 48 μmol, 3 equiv.) and di-*tert*-butyl *N,N*-diisopropylphosphoramidite (15 μl, 48 μmol, 3 equiv.) were added and the mixture was stirred at r.t. After 1 h, the mixture was cooled to 0 °C and *m*CPBA (14 mg, 80 μmol, 5 equiv.) was added. The reaction mixture was warmed to r.t. and stirred for 1 h. The mixture was concentrated, re-dissolved in CH<sub>2</sub>Cl<sub>2</sub> (1 ml) and treated following General Procedure A. After solvent removal, the crude material was purified by HPLC [eluent A: H<sub>2</sub>O + 0.1% TFA; eluent B: MeCN, ramp from 10% B (at min 1) to 77% B (at min 14), *t<sub>R</sub>* (product): 8.1 min]. The purified product was then lyophilized to give **Sp2-CPT** as a yellow solid (8 mg, 83%).

<sup>31</sup>P NMR (162 MHz, d<sub>6</sub>-DMSO + D<sub>2</sub>O) δ -1.42 ppm (rotamers). MS (ESI) *m/z* calcd. for [C<sub>28</sub>H<sub>31</sub>N<sub>4</sub>NaO<sub>9</sub>P]<sup>+</sup>: 621.17 [M+Na]<sup>+</sup>, found: 621.19; MS (ESI) *m/z* calcd. for [C<sub>28</sub>H<sub>30</sub>N<sub>4</sub>O<sub>9</sub>P]<sup>+</sup>: 597.18 [M-H]<sup>+</sup>, found: 597.04; HRMS (ESI) *m/z* calcd. for [C<sub>28</sub>H<sub>32</sub>N<sub>4</sub>O<sub>9</sub>P]<sup>+</sup>: 599,1901 [M+H]<sup>+</sup>, found: 599,1901.

### Sp3-CPT

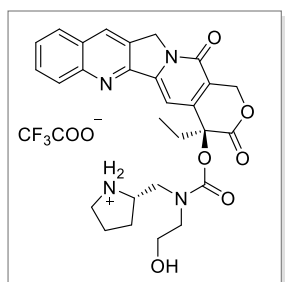

$C_{28}H_{30}N_4O_6$   
MW: 518,57g · mol<sup>-1</sup> + TFA

Compound **12** (56 mg, 90 μmol, 1 equiv.) was dissolved in CH<sub>2</sub>Cl<sub>2</sub> (2 ml) and treated following General Procedure A. After solvent removal, the crude material was purified by HPLC [eluent A: H<sub>2</sub>O + 0.1% TFA; eluent B: MeCN, ramp from 5% B (at min 1) to 70% B (at min 12), *t<sub>R</sub>* (product): 8.8 min]. The purified product was then lyophilized to give **Sp3-CPT** as a yellow solid (47 mg, 82%).

HRMS (ESI) *m/z* calcd. for [C<sub>28</sub>H<sub>31</sub>N<sub>4</sub>O<sub>6</sub>]<sup>+</sup>: 519,2238 [M+H]<sup>+</sup>, found: 519,2239.

### Synthesis of Camptothecin Prodrugs 5 and 6

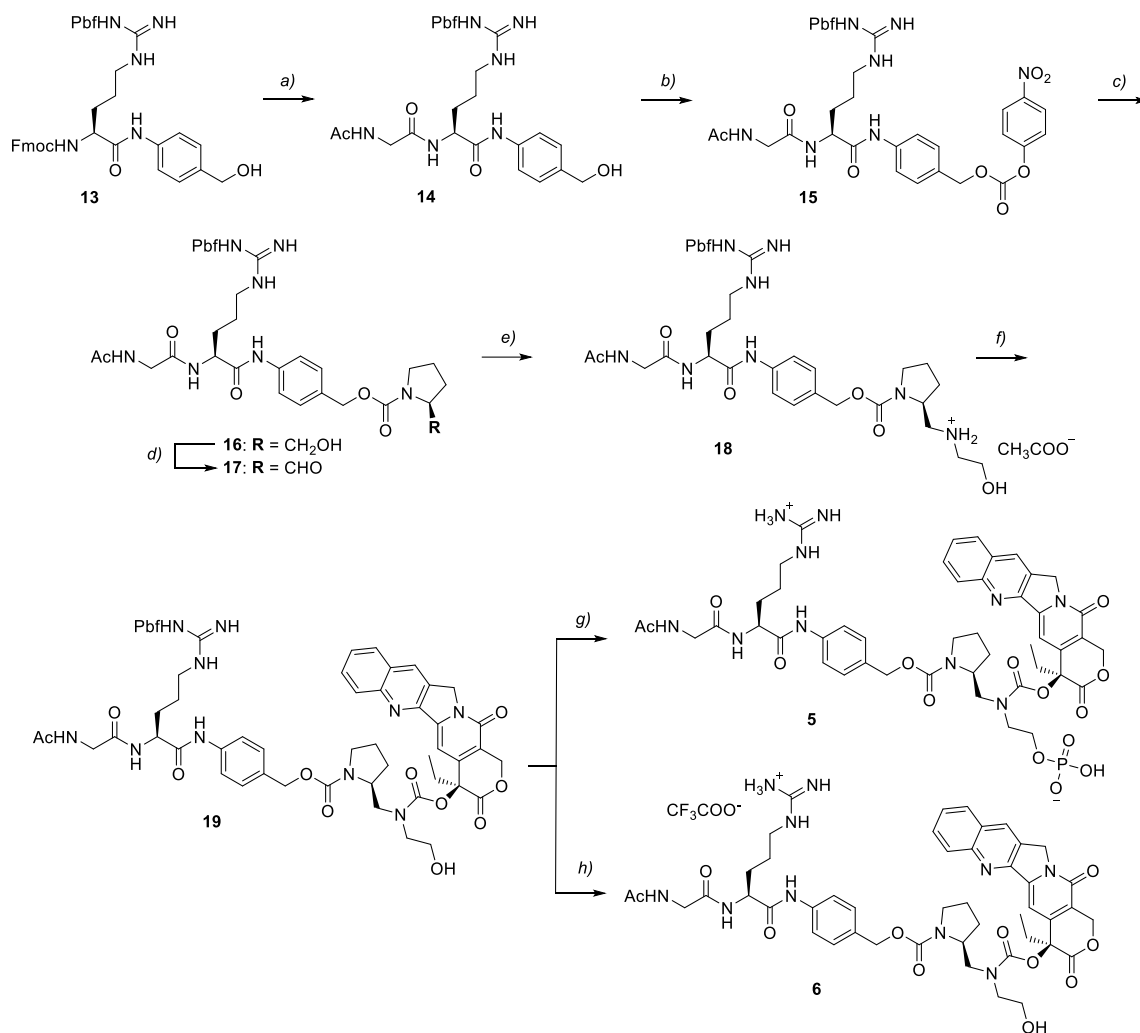

**Scheme S3.** REAGENTS AND CONDITIONS: a) [1] Piperidine, DMF, 0 °C to r.t. 1h; [2] Ac-Gly-OH, HATU, *i*Pr<sub>2</sub>NEt, DMF, 0 °C to r.t. 16h; b) bis(4-nitrophenyl) carbonate, *i*Pr<sub>2</sub>NEt, THF, 50 °C, 6 h; c) L-prolinol, THF, 0 °C, 1 h; d) Dess-Martin periodinane, CH<sub>2</sub>Cl<sub>2</sub>, 0 °C to r.t. 1h; e) Ethanolamine, NaBH(OAc)<sub>3</sub>, AcOH, CH<sub>2</sub>Cl<sub>2</sub>, r.t. 16 h; f) **CPT-PNP**, *i*Pr<sub>2</sub>NEt, CH<sub>2</sub>Cl<sub>2</sub>, r.t. 48 h; g) [1] di-*tert*-butyl *N,N*-diisopropylphosphoramidite, 1*H*-tetrazole, CH<sub>2</sub>Cl<sub>2</sub>, r.t. 1 h; [2] *m*CPBA, 0 °C to r.t. 1 h; [3] TFA/triisopropylsilane/H<sub>2</sub>O 94:3:3 0 °C 2 h; h) TFA/triisopropylsilane/H<sub>2</sub>O 94:3:3 0 °C 2 h.

*Ac-Gly-Arg(Pbf)-PABOH (14)*

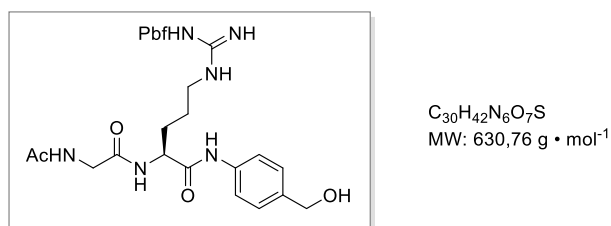

Fmoc-Arg(Pbf)-PABOH<sup>4</sup> (**13**, 550 mg, 0.73 mmol, 1 equiv.) was dissolved in dry DMF (4 ml) and cooled to 0 °C. Piperidine (360 µl, 3.64 mmol, 5 equiv.) was added and the mixture was stirred for 1 h at r.t.. The solvent was removed under high vacuum and the crude was filtered through a plug of silica (dry load, initial elution with 1:1 AcOEt:Hex mixture, followed by 10% MeOH in CH<sub>2</sub>Cl<sub>2</sub> + 0.2% Et<sub>3</sub>N), obtaining H-Arg(Pbf)-PABOH (360 mg, 93%) as a white foam. Ac-Gly-OH (85 mg, 0.73 mmol, 1 equiv.) was dissolved in dry DMF (3 ml), cooled to 0 °C under a nitrogen atmosphere and HATU (304 mg, 0.80 mmol, 1.1 equiv.) and *i*Pr<sub>2</sub>NEt (380 µl, 2.19 mmol, 3 equiv.) were added. The mixture was stirred for 15 min. at room temperature, then a solution of H-Arg(Pbf)-PABOH in dry DMF (2 ml) was



added to the reacting solution. The resulting mixture was stirred at r.t. overnight and the solvent was removed under high vacuum. The crude solid was dissolved with CH<sub>2</sub>Cl<sub>2</sub> (150 ml) and washed with a 1:1 mixture of brine and a 1 M aq. KHSO<sub>4</sub> solution (2 × 40 ml) and with a 1:1 mixture of brine and a sat. aq. NaHCO<sub>3</sub> solution (2 × 40 ml). The organic phase was dried and concentrated. The crude was purified by flash chromatography (eluent: 11% MeOH in CH<sub>2</sub>Cl<sub>2</sub>) to give **14** as a white solid (300 mg, 65%).

<sup>1</sup>H NMR (400 MHz, MeOD) δ 7.56 (d, *J* = 8.6 Hz, 2H), 7.30 (d, *J* = 8.6 Hz, 2H), 4.56 (s, 2H), 4.52 (dd, *J* = 9.0, 5.1 Hz, 1H), 3.88 (Gly AB system, 2H), 3.20 (m, 2H), 2.97 (s, 2H), 2.56 (s, 3H), 2.50 (s, 3H), 2.05 (s, 3H), 2.01 (s, 3H), 1.90 (m, 1H), 1.73 (m, 1H), 1.59 (m, 2H), 1.44 (s, 6H) ppm; <sup>13</sup>C NMR (101 MHz, MeOD) δ 174.1, 172.3, 171.8, 159.9, 158.1, 139.4, 138.9, 138.5, 133.5, 128.5, 126.0, 121.5, 118.4, 87.7, 64.8, 54.9, 43.9, 43.7, 30.5, 28.7, 27.0, 22.5, 19.6, 18.4, 12.5 ppm.

#### Ac-Gly-Arg(Pbf)-PAB-PNP (**15**)

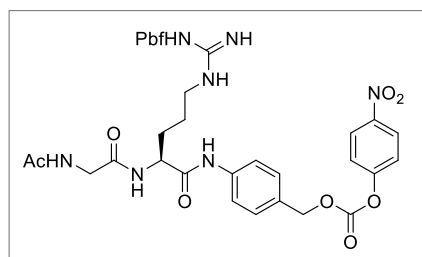

C<sub>37</sub>H<sub>45</sub>N<sub>7</sub>O<sub>11</sub>S  
MW: 795.87 g • mol<sup>-1</sup>

Alcohol **14** (300 mg, 0.47 mmol, 1 equiv.) was dissolved in dry THF (4 ml) and added, under a nitrogen atmosphere, to a flask containing bis(4-nitrophenyl) carbonate (573 mg, 1.88 mmol, 4 equiv.). *i*Pr<sub>2</sub>NEt (329 μl, 1.88 mmol, 4 equiv.) was added and the mixture was stirred at 50 °C for 6 h. The solvent was removed and the crude was dissolved with AcOEt (150 ml) and washed with a 1 M aq. KHSO<sub>4</sub> solution (1 × 30 ml). The organic phase was dried and concentrated. The crude solid was mixed with silica and eluted through a pad of silica gel, using this sequence of eluents: 1) 8:2 AcOEt:Hex; 2) AcOEt; 3) 1:1 AcOEt:acetone; 4) acetone. Product eluted between the 3<sup>rd</sup> and 4<sup>th</sup> elution step. Product-containing fractions were pooled and concentrated, to give **15** as a white solid (215 mg, 57%).

<sup>1</sup>H NMR (400 MHz, d<sub>6</sub>-DMSO) δ 10.06 (s, 1H), 8.31 (d, *J* = 9.2 Hz, 2H), 8.19 (d, *J* = 7.9 Hz, 1H), 8.13 (t, *J* = 5.7 Hz, 1H), 7.68 (d, *J* = 8.5 Hz, 2H), 7.56 (d, *J* = 9.2 Hz, 2H), 7.42 (d, *J* = 8.5 Hz, 2H), 5.25 (s, 2H), 4.41 (dd, *J* = 13.7, 8.0 Hz, 1H), 3.74 (d, *J* = 5.7 Hz, 2H), 3.11 – 3.00 (m, 2H), 2.93 (s, 2H), 2.46 (s, 3H), 2.41 (s, 2H), 1.98 (s, 3H), 1.86 (s, 3H), 1.74 (m, 1H), 1.58 (m, 1H), 1.51 – 1.41 (m, 2H), 1.39 (s, 6H) ppm; <sup>13</sup>C NMR (101 MHz, d<sub>6</sub>-DMSO) δ 170.6, 169.8, 169.1, 157.4, 156.1, 155.3, 152.0, 145.2, 139.2, 137.3, 131.4, 129.4, 125.4, 124.3, 122.6, 119.3, 116.3, 86.3, 70.2, 53.0, 42.4, 42.1, 39.3 (overlapped with solvent signal), 29.4, 28.3, 22.5, 18.9, 17.6, 12.2 ppm.

#### Ac-Gly-Arg(Pbf)-PABC-Prolinol (**16**)

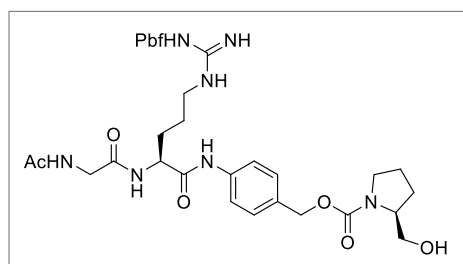

C<sub>36</sub>H<sub>51</sub>N<sub>7</sub>O<sub>9</sub>S  
MW: 757.90 g • mol<sup>-1</sup>

Carbonate **15** (200 mg, 0.25 mmol, 1 equiv.) was dissolved in dry THF (4 ml) and cooled to 0 °C. L-Prolinol (65 μl, 0.62 mmol, 2.5 equiv.) was slowly added and the mixture turned yellow immediately. The mixture was stirred at 0 °C for 1 h, when TLC analysis (5% MeOH in CH<sub>2</sub>Cl<sub>2</sub>) indicated full starting material conversion. The mixture was diluted with CH<sub>2</sub>Cl<sub>2</sub> (40 ml) and washed with a 1 M aq. KHSO<sub>4</sub> solution (2 × 20 ml). The aqueous phase was extracted with CH<sub>2</sub>Cl<sub>2</sub> (2 × 30 ml) and AcOEt (1 × 30 ml). The collected organic phase was dried and concentrated. The crude material was purified by flash chromatography (gradient from 6% MeOH in CH<sub>2</sub>Cl<sub>2</sub> to 10% MeOH in CH<sub>2</sub>Cl<sub>2</sub>) to give **16** as a white solid (160 mg, 85%).

<sup>1</sup>H NMR (400 MHz, MeOD) δ 7.59 (d, *J* = 8.3 Hz, 2H), 7.33 (d, *J* = 8.3 Hz, 2H), 5.17 – 5.01 (m, 2H), 4.52 (dd, *J* = 8.9, 5.1 Hz, 1H), 3.94 – 3.79 (m, 3H), 3.59 (m, 1H), 3.51 – 3.35 (m, 3H), 3.27 – 3.12 (m, 2H), 2.97 (s, 2H), 2.55 (s, 3H), 2.50 (s, 3H), 2.04 (s, 3H), 2.01 (s, 3H), 1.98 – 1.79 (m, 5H), 1.62 (m, 1H), 1.66 – 1.51 (m, 2H), 1.44 (s, 6H) ppm; <sup>13</sup>C NMR (101 MHz, MeOD) δ 174.0, 172.3, 171.8, 159.9,

*Ac-Gly-Arg(Pbf)-PABC-Prolinal (17)*

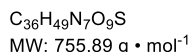

MS (ESI)  $m/z$  calcd. for  $[C_{36}H_{50}N_7O_9S]^+$ : 756.34  $[M+H]^+$ , found: 756.10;  $m/z$  calcd. for  $[C_{36}H_{49}N_7NaO_9S]^+$ : 778.32  $[M+Na]^+$ , found: 778.28.

$C_{38}H_{56}N_8O_9S$   
MW: 800,97 g · mol<sup>-1</sup> + AcOH

MS (ESI)  $m/z$  calcd. for  $[\text{C}_{38}\text{H}_{57}\text{N}_8\text{O}_9\text{S}]^+$ : 801.40  $[\text{M}+\text{H}]^+$ , found: 801.27;  $m/z$  calcd. for  $[\text{C}_{38}\text{H}_{55}\text{N}_8\text{O}_9\text{S}]^-$ : 799.38  $[\text{M}-\text{H}]^-$ , found: 799.77.  $^1\text{H}$  NMR (400 MHz, MeOD)  $\delta$  7.61 (d,  $J$  = 8.3 Hz, 2H), 7.35 (d,  $J$  = 8.3 Hz, 2H), 5.14 (d,  $J$  = 12.0 Hz, 1H), 5.10 (d,  $J$  = 12.0 Hz, 1H), 4.52 (dd,  $J$  = 8.8, 5.1 Hz, 1H), 4.16 (m, 1H), 3.88 (s, 2H), 3.80 (t,  $J$  = 5.1 Hz, 2H), 3.55 (m, 1H), 3.43 (m, 1H), 3.27 – 3.02 (m, 6H), 2.98 (s, 2H), 2.55 (s, 3H), 2.50 (s, 3H), 2.17 (m, 1H), 2.05 (s, 3H), 2.01 (s, 3H), 1.99 (s, 3H), 1.96 – 1.84 (m, 3H), 1.79 – 1.67 (m, 2H), 1.66 – 1.53 (m, 2H), 1.44 (s, 6H) ppm;  $^{13}\text{C}$  NMR (101 MHz, MeOD)  $\delta$  175.2, 174.1, 172.4, 171.9, 158.8, 158.0, 139.5, 133.7, 129.9, 126.1, 121.5, 118.6, 87.8, 68.4, 57.8, 56.4, 54.9, 53.7, 51.0, 48.6 (overlapped with solvent signal), 43.9, 43.8, 41.3, 30.8, 30.4, 28.7, 26.9, 24.8, 22.5, 20.7, 19.6, 18.4, 12.5 ppm.

*Ac-Gly-Arg(Pbf)-PABC-Pro(OH)-CPT (19)*

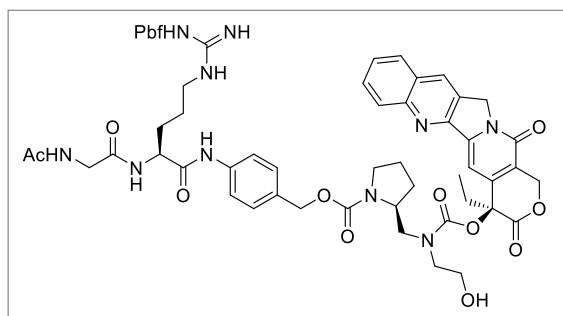

$C_{59}H_{70}N_{10}O_{14}S$   
MW: 1175,33 g • mol<sup>-1</sup>

Dry  $CH_2Cl_2$  (1 ml) was added to a flask containing **18** (10 mg, 11.6  $\mu$ mol, 1 equiv.) and **CPT-PNP** (8.9 mg, 17.4  $\mu$ mol, 1.5 equiv.) under a nitrogen atmosphere.  $iPr_2NEt$  (5  $\mu$ l, 29  $\mu$ mol, 2.5 equiv.) was added and the mixture was stirred at r.t. for 48 h. The solvent was removed and the mixture was purified by flash chromatography (1<sup>st</sup> eluent: 4% MeOH in  $CH_2Cl_2$ ; 2<sup>nd</sup> eluent: 10% MeOH in  $CH_2Cl_2$ ), to give carbamate **19** as a white solid (10 mg, 72%).

$R_f$  = 0.40 (9:1  $CH_2Cl_2$ /MeOH). MS (ESI)  $m/z$  calcd. for  $[C_{59}H_{70}N_{10}NaO_{14}S]^+$ : 1197.47  $[M+Na]^+$ , found: 1197.68.  $^1H$  NMR (400 MHz,  $d_6$ -DMSO)  $\delta$  9.97 (bs, 3H), 8.68 (s, 1H), 8.18 – 8.07 (m, 4H), 7.88 – 7.80 (m, 1H), 7.71 (m, 1H), 7.58 (dd,  $J$  = 13.9, 8.4 Hz, 2H), 7.41 – 7.21 (m, 2H), 7.12 (m, 1H), 6.54 (bs, 3H), 5.50 – 5.41 (m, 2H), 5.29 (s, 2H), 5.11 – 4.96 (m, 2H), 4.91 (t,  $J$  = 5.1 Hz, 1H), 4.66 (m, 1H), 4.40 (m, 1H), 4.17 (m, 1H), 4.08 (m, 1H), 3.79 – 3.63 (m, 3H), 3.58 – 3.38 (m, 3H), 3.29 – 3.18 (m, 2H), 3.05 (bs, 2H), 2.92 (s, 2H), 2.45 (s, 3H), 2.40 (s, 3H), 2.20 – 2.10 (m, 2H), 1.96 (s, 3H), 1.86 (s, 3H), 1.77 – 1.65 (m, 2H), 1.63 – 1.52 (m, 2H), 1.48 – 1.41 (m, 2H), 1.38 (s, 6H), 0.98 – 0.83 (m, 3H) ppm;  $^{13}C$  NMR (101 MHz,  $d_6$ -DMSO)  $\delta$  170.4, 169.8, 169.1, 167.9, 167.7, 157.4, 156.6, 156.1, 154.2, 153.8, 152.4, 147.9, 145.8, 145.7, 138.3, 137.3, 132.0, 131.6, 131.4, 130.4, 129.8, 129.0, 128.5, 128.3, 128.0, 127.7, 124.3, 119.3, 116.3, 95.5, 95.2, 86.3, 75.7, 66.4, 66.0, 59.1, 58.1, 55.9, 53.0, 50.2, 49.8, 42.4, 42.1, 39.3 (overlapped with solvent signal), 30.8, 30.2, 29.5, 28.3, 25.6, 25.6, 22.5, 18.9, 17.6, 12.2, 7.8, 7.6 ppm.

**Ac-Gly-Arg-PABC-Pro(OPO<sub>3</sub>H<sub>2</sub>)-CPT (5)**

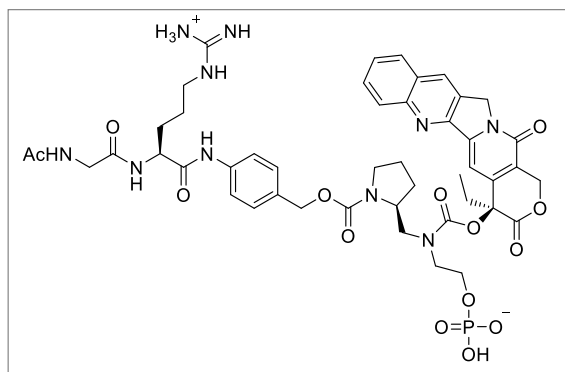

C<sub>46</sub>H<sub>55</sub>N<sub>10</sub>O<sub>14</sub>P  
MW: 1002,98 g • mol<sup>-1</sup>

Alcohol **19** (18 mg, 15.3 μmol, 1 equiv.) was dissolved in dry CH<sub>2</sub>Cl<sub>2</sub> (2 ml) under a nitrogen atmosphere. 1*H*-tetrazole (136 μl of a 0.45 M solution in anhydrous MeCN, 61.2 μmol, 4 equiv.) and di-*tert*-butyl *N,N*-diisopropylphosphoramidite (19 μl, 61.2 μmol, 4 equiv.) were added and the mixture was stirred at r.t.. After 1 h, the mixture was cooled to 0 °C and *m*CPBA (16 mg, 76 μmol, 5 equiv.) was added. The reaction mixture was warmed to r.t. and stirred for 1 h. The mixture was concentrated, dissolved in a 94:3:3 mixture of TFA/triisopropylsilane/H<sub>2</sub>O (1 ml) and stirred at 0 °C for 2 h. The solution was diluted with ca. 40 ml of cold Et<sub>2</sub>O and the resulting yellow precipitate was isolated by centrifugation and purified by HPLC [eluent A: H<sub>2</sub>O + 0.1% TFA; eluent B: MeCN, ramp from 10% B (at min 1) to 75% B (at min 12), *t<sub>R</sub>* (product): 7.9 min]. (**NOTE**: Product **5** was isolated in ca. 90% purity, since its very broad UV peak observed during RP-HPLC purification hindered the complete removal of an impurity, which was identified as the analogue *H*-phosphonate monoester. For more information see "Entry **0**" in Figure S1/S2). The product was then lyophilized to give **5** as a yellow solid (5 mg, 32%).

HRMS (ESI) *m/z* calcd. for [C<sub>46</sub>H<sub>56</sub>N<sub>10</sub>O<sub>14</sub>P]<sup>+</sup>: 1003.3715 [M+H]<sup>+</sup>, found: 1003.3723.

**Ac-Gly-Arg-PABC-Pro(OH)-CPT (6)**

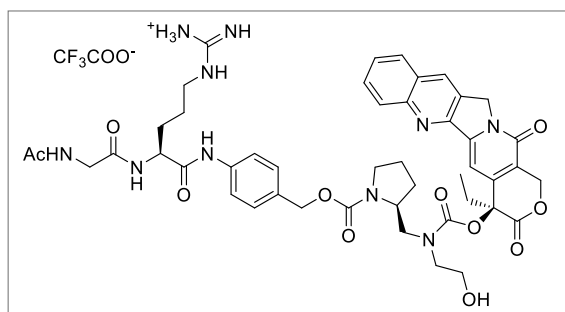

C<sub>46</sub>H<sub>54</sub>N<sub>10</sub>O<sub>11</sub>  
MW: 923,00 g • mol<sup>-1</sup> + TFA

Compound **19** (9 mg, 7.7 μmol, 1 equiv.) was dissolved in a 94:3:3 mixture of TFA/triisopropylsilane/H<sub>2</sub>O (1 ml) and stirred at 0 °C for 2 h. The solution was diluted with ca. 40 ml of cold Et<sub>2</sub>O and the resulting yellow precipitate was isolated by centrifugation and purified by HPLC [eluent A: H<sub>2</sub>O + 0.1% TFA; eluent B: MeCN, ramp from 5% B (at min 1) to 100% B (at min 20), *t<sub>R</sub>* (product): 10.5 min]. The purified product was then lyophilized to give **6** as a yellow solid (6 mg, 84%).

MS (ESI) *m/z* calcd. for [C<sub>46</sub>H<sub>55</sub>N<sub>10</sub>O<sub>11</sub>]<sup>+</sup>: 923.40 [M+H]<sup>+</sup>, found: 923.59; MS (ESI) *m/z* calcd. for [C<sub>46</sub>H<sub>56</sub>N<sub>10</sub>O<sub>11</sub>]<sup>2+</sup>: 462.21 [M+2H]<sup>2+</sup>, found: 462.69.

## Enzyme-free Carbamate Cleavage Studies

### Experimental Procedure

Stock solutions of lyophilized coumarin carbamates (compounds **Sp(1-3)-CMR**; final concentration: 50 mM in DMSO) and Camptothecin prodrugs (compounds **Sp(1-3)-CPT**; final concentration: 25 mM in DMSO) were diluted with further DMSO and 25 mM aqueous buffers according to the following scheme:

|                                   | <b>Sp(1-3)-CMR</b>          | <b>Sp(1-3)-CPT</b>                                  |
|-----------------------------------|-----------------------------|-----------------------------------------------------|
| Sample (in DMSO) (Volume % Total) | 5% - [2.5 mM] final         | 4% - [1 mM] final                                   |
| Neat DMSO (Volume % Total)        | 5%                          | 6%                                                  |
| Aq. Buffer (Volume % Total)       | 90%                         | 90%                                                 |
| Buffer Type                       | 25 mM Acetate Buffer pH 5.0 | 25 mM HEPES Buffer pH 7.5 + 0.5 mM Mg <sup>++</sup> |

Immediately after preparation, the mixtures were incubated at 37 °C and aliquots were collected at different time points and diluted with a blocking buffer, according to the following scheme:

|                 | <b>Sp(1-3)-CMR</b>          | <b>Sp(1-3)-CPT</b>                   |
|-----------------|-----------------------------|--------------------------------------|
| Blocking buffer | H <sub>2</sub> O + 0.2% TFA | 8:2 H <sub>2</sub> O/MeCN + 0.2% TFA |
| Dilution        | 1:2.5 - [1 mM] final        | 1:4 - [0.25 mM] final                |

The diluted aliquots were injected into an analytical HPLC-PDA system, using the following parameters:

|             | <b>Sp(1-3)-CMR</b>            | <b>Sp(1-3)-CPT</b>             |
|-------------|-------------------------------|--------------------------------|
| Eluent A    | H <sub>2</sub> O + 0.1% TFA   | H <sub>2</sub> O + 0.1% TFA    |
| Eluent B    | CH <sub>3</sub> CN + 0.1% TFA | CH <sub>3</sub> CN + 0.1% TFA  |
| Flow Rate   | 1 ml/min                      | 1 ml/min                       |
| Gradient    | From 0% B to 50% B in 15 min. | From 10% B to 50% B in 25 min. |
| UV analysis | 254 nm                        | 330 nm                         |

Areas under the curve (AUC) of the detected peaks were measured using Waters Empower software. The rate of free OH release from the starting carbamate were obtained by calculating the relative ratios of AUC values corresponding to the amine-bearing prodrug and the free payload. Data were plotted and half-lives ( $t_{1/2}$ ) were calculated by non-linear fitting.

HPLC Data – Coumarin Carbamates

- Sp1-CMR 2.5 mM
- 25 mM acetate buffer + 10 % DMSO
- pH 5.0, T: 37 °C

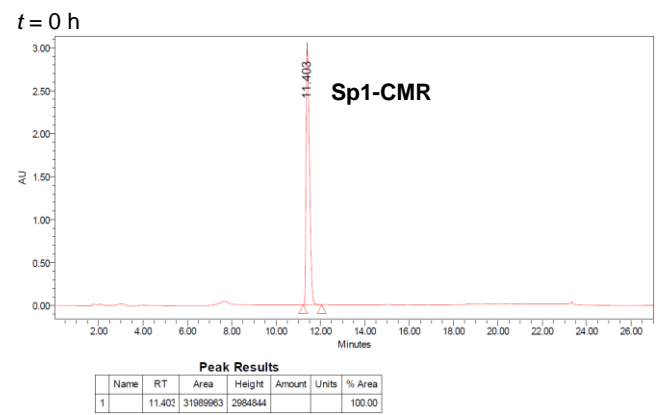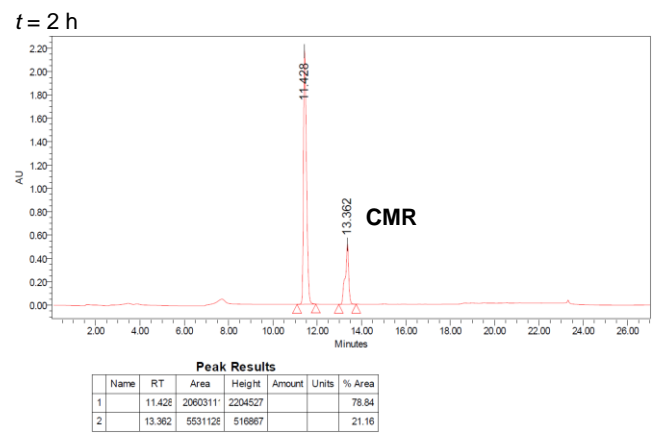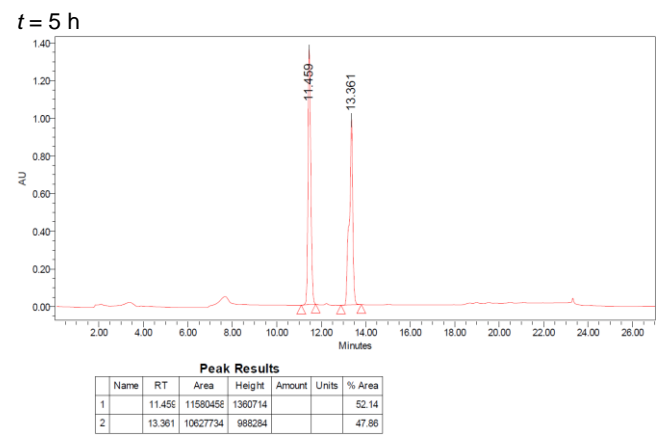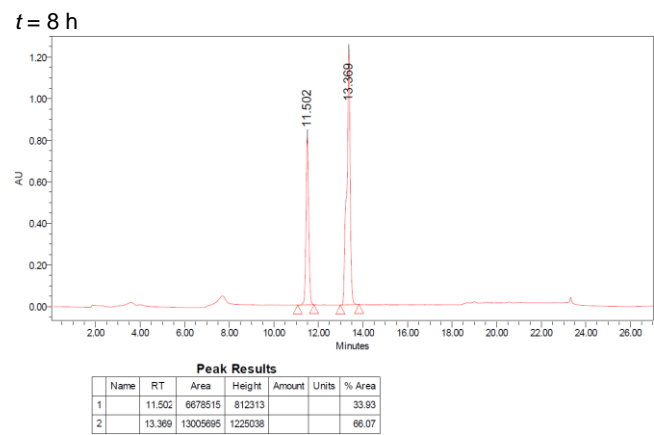

- Sp2-CMR 2.5 mM
- 25 mM acetate buffer + 10 % DMSO
- pH 5.0, T: 37 °C

$t = 0$  h

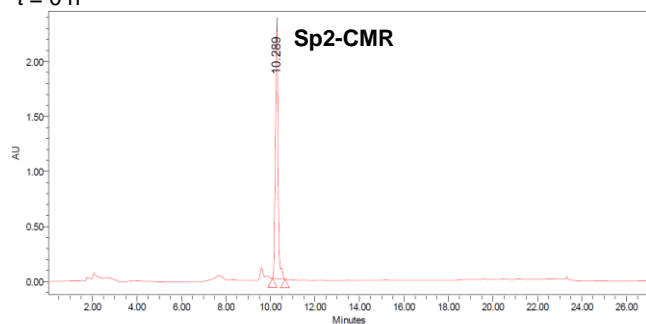

| Peak Results |        |          |         |        |       |        |
|--------------|--------|----------|---------|--------|-------|--------|
| Name         | RT     | Area     | Height  | Amount | Units | % Area |
| 1            | 10.289 | 19490659 | 2307205 |        |       | 100.00 |

$t = 2$  h

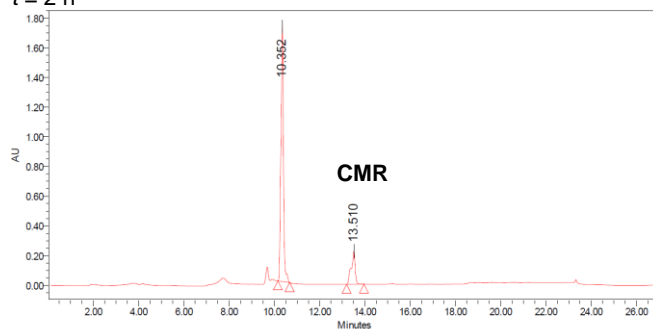

| Peak Results |        |          |         |        |       |        |
|--------------|--------|----------|---------|--------|-------|--------|
| Name         | RT     | Area     | Height  | Amount | Units | % Area |
| 1            | 10.352 | 13304840 | 1723323 |        |       | 83.60  |
| 2            | 13.510 | 2609553  | 223622  |        |       | 16.40  |

$t = 5$  h

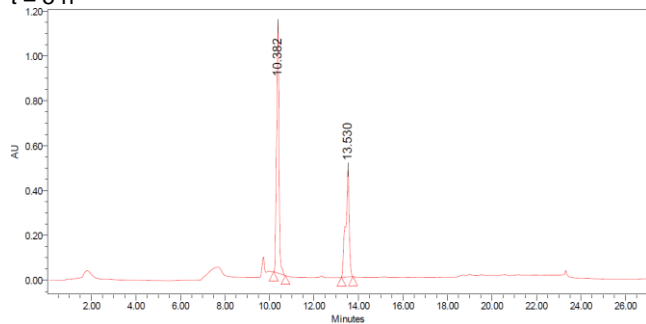

| Peak Results |        |         |         |        |       |        |
|--------------|--------|---------|---------|--------|-------|--------|
| Name         | RT     | Area    | Height  | Amount | Units | % Area |
| 1            | 10.382 | 8306576 | 1112052 |        |       | 60.79  |
| 2            | 13.530 | 5358875 | 482275  |        |       | 39.21  |

$t = 8$  h

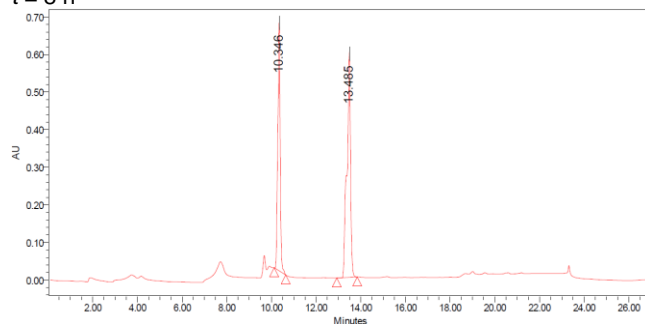

| Peak Results |        |         |        |        |       |        |
|--------------|--------|---------|--------|--------|-------|--------|
| Name         | RT     | Area    | Height | Amount | Units | % Area |
| 1            | 10.346 | 4825225 | 666848 |        |       | 42.39  |
| 2            | 13.485 | 6694804 | 597949 |        |       | 57.61  |

- Sp2-CMR 2.5 mM
- 25 mM acetate buffer + 10 % DMSO
- pH 5.0, T: 37 °C

$t = 0$  h

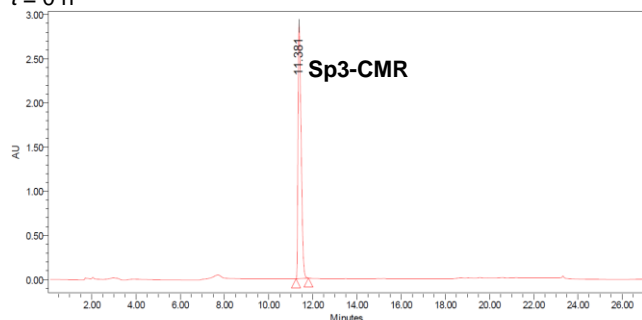

| Peak Results |        |          |         |        |       |        |
|--------------|--------|----------|---------|--------|-------|--------|
| Name         | RT     | Area     | Height  | Amount | Units | % Area |
| 1            | 11.381 | 28018998 | 2919708 |        |       | 100.00 |

$t = 2$  h

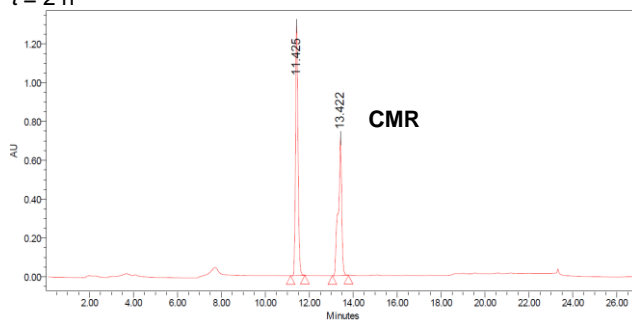

| Peak Results |        |          |         |        |       |        |
|--------------|--------|----------|---------|--------|-------|--------|
| Name         | RT     | Area     | Height  | Amount | Units | % Area |
| 1            | 11.425 | 10112436 | 1300709 |        |       | 56.38  |
| 2            | 13.422 | 7823450  | 708482  |        |       | 43.62  |

$t = 5$  h

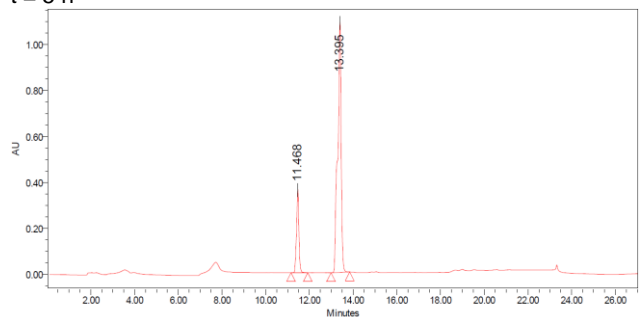

| Peak Results |        |          |         |        |       |        |
|--------------|--------|----------|---------|--------|-------|--------|
| Name         | RT     | Area     | Height  | Amount | Units | % Area |
| 1            | 11.468 | 2713897  | 361702  |        |       | 18.55  |
| 2            | 13.395 | 11912686 | 1090336 |        |       | 81.45  |

$t = 8$  h

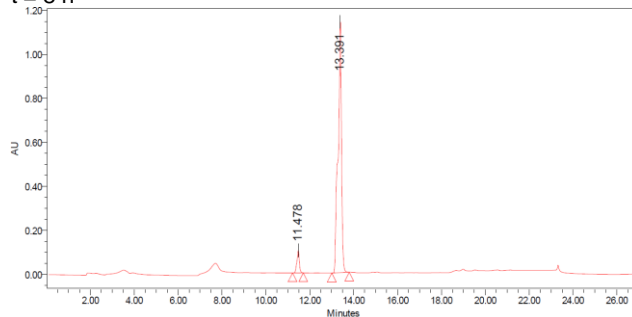

| Peak Results |        |          |         |        |       |        |
|--------------|--------|----------|---------|--------|-------|--------|
| Name         | RT     | Area     | Height  | Amount | Units | % Area |
| 1            | 11.478 | 780832   | 103058  |        |       | 5.89   |
| 2            | 13.391 | 12482665 | 1144596 |        |       | 94.11  |



HPLC Data – CPT Prodrugs

- Sp1-CPT 1 mM
- 25 mM HEPES Buffer pH 7.5 + 0.5 mM Mg<sup>++</sup> + 10% DMSO
- pH 7.5, T: 37 °C
- 

t = 0 h

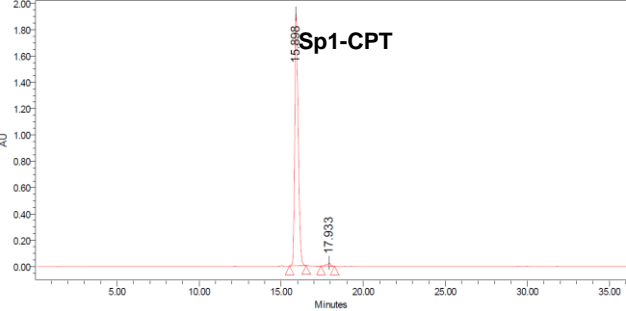

| Peak Results |        |          |         |        |        |
|--------------|--------|----------|---------|--------|--------|
| Name         | RT     | Area     | Height  | Amount | % Area |
| 1            | 15.898 | 27888006 | 1933080 |        | 98.53  |
| 2            | 17.933 | 416825   | 24456   |        | 1.47   |

t = 2 h

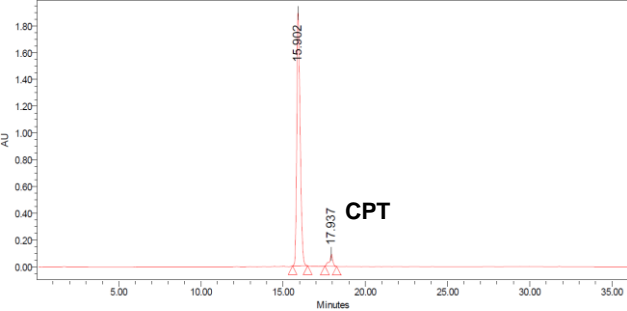

| Peak Results |        |          |         |        |        |
|--------------|--------|----------|---------|--------|--------|
| Name         | RT     | Area     | Height  | Amount | % Area |
| 1            | 15.902 | 27057964 | 1891309 |        | 95.61  |
| 2            | 17.937 | 1242904  | 90695   |        | 4.39   |

t = 5 h

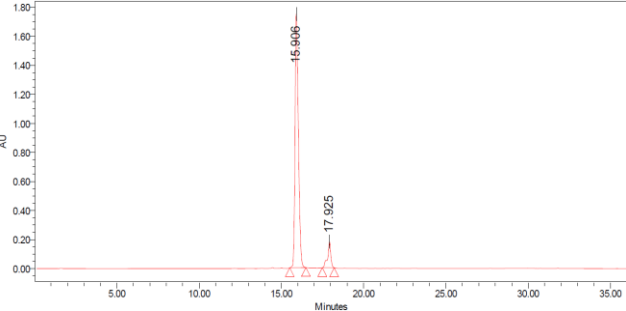

| Peak Results |        |          |         |        |        |
|--------------|--------|----------|---------|--------|--------|
| Name         | RT     | Area     | Height  | Amount | % Area |
| 1            | 15.906 | 24526065 | 1749015 |        | 91.17  |
| 2            | 17.925 | 2374323  | 180680  |        | 8.83   |

t = 8 h

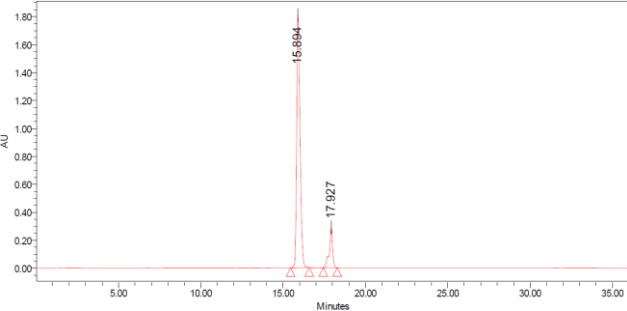

| Peak Results |        |          |         |        |        |
|--------------|--------|----------|---------|--------|--------|
| Name         | RT     | Area     | Height  | Amount | % Area |
| 1            | 15.894 | 25739827 | 1821741 |        | 86.95  |
| 2            | 17.927 | 3862941  | 288045  |        | 13.05  |

- Sp2-CPT 1 mM
- 25 mM HEPES Buffer pH 7.5 + 0.5 mM Mg<sup>++</sup> + 10% DMSO
- pH 7.5, T: 37 °C

*t* = 0 h

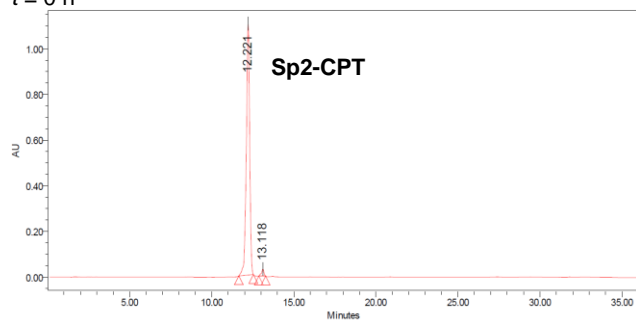

| Name | RT     | Area     | Height  | Amount | Units | % Area |
|------|--------|----------|---------|--------|-------|--------|
| 1    | 12.221 | 15649537 | 1101763 |        |       | 98.00  |
| 2    | 13.118 | 319071   | 30557   |        |       | 2.00   |

*t* = 2 h

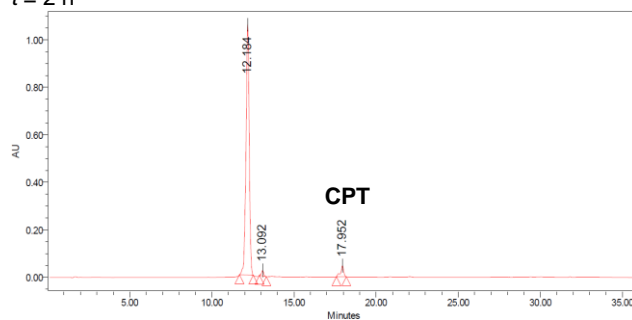

| Name | RT     | Area     | Height  | Amount | Units | % Area |
|------|--------|----------|---------|--------|-------|--------|
| 1    | 12.184 | 14550772 | 1055161 |        |       | 94.72  |
| 2    | 13.092 | 216028   | 23392   |        |       | 1.41   |
| 3    | 17.952 | 595465   | 47170   |        |       | 3.88   |

*t* = 5 h

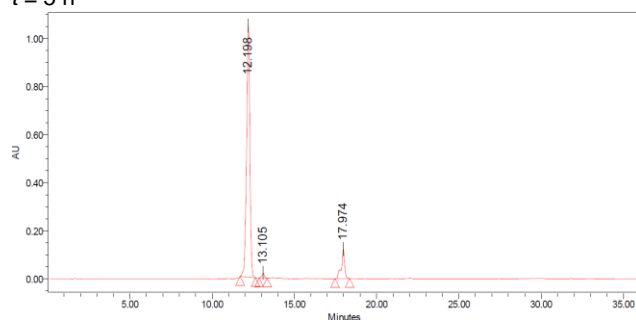

| Name | RT     | Area     | Height  | Amount | Units | % Area |
|------|--------|----------|---------|--------|-------|--------|
| 1    | 12.198 | 14566299 | 1050653 |        |       | 86.37  |
| 2    | 13.105 | 224852   | 20862   |        |       | 1.36   |
| 3    | 17.974 | 1691846  | 123218  |        |       | 10.26  |

*t* = 8 h

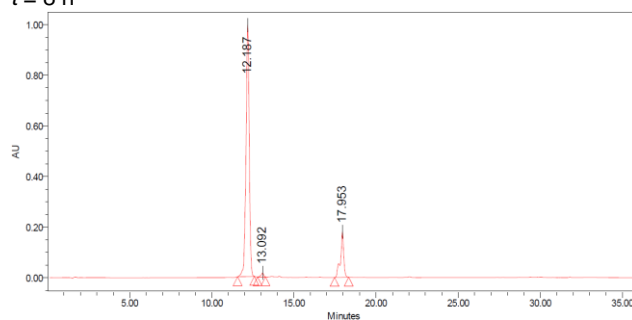

| Name | RT     | Area     | Height | Amount | Units | % Area |
|------|--------|----------|--------|--------|-------|--------|
| 1    | 12.187 | 13710183 | 994137 |        |       | 84.01  |
| 2    | 13.092 | 167866   | 15629  |        |       | 1.03   |
| 3    | 17.953 | 2441616  | 180927 |        |       | 14.96  |

- Sp3-CPT 1 mM
- 25 mM HEPES Buffer pH 7.5 + 0.5 mM Mg<sup>++</sup> + 10% DMSO
- pH 7.5, T: 37 °C

*t* = 0 h

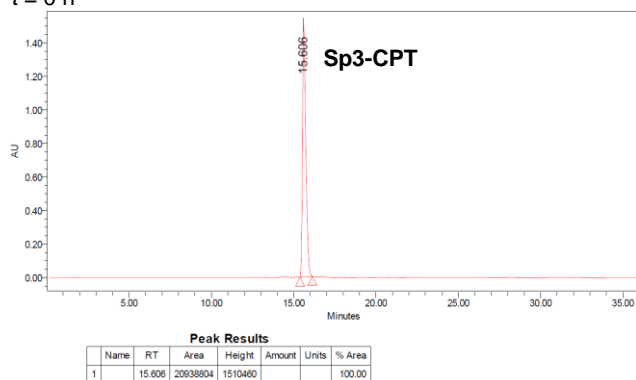

*t* = 2 h

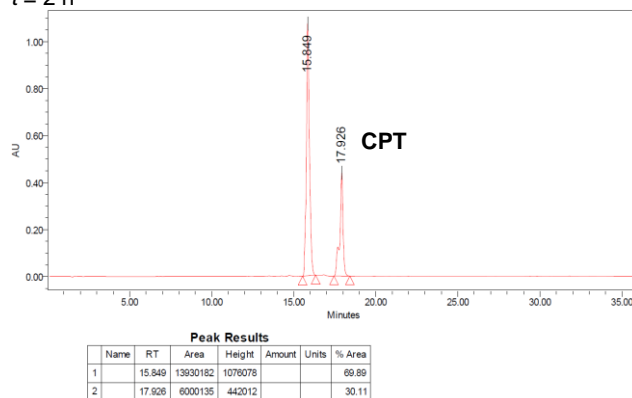

*t* = 5 h

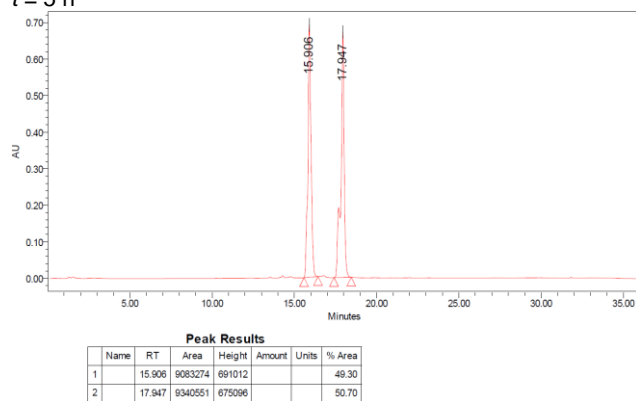

*t* = 8 h

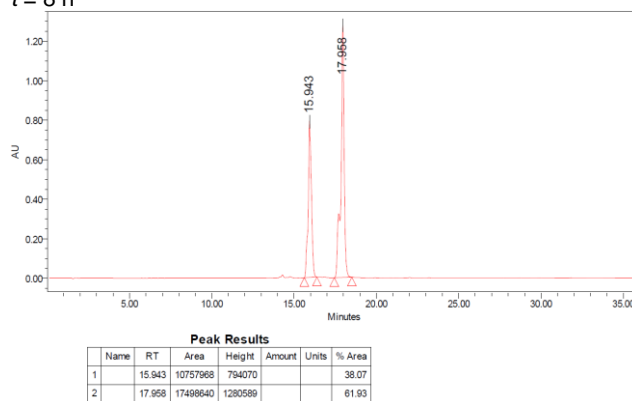

## Carbamate Cleavage Studies in the presence/absence of Phosphatase

### Experimental Procedure

Stock solutions of lyophilized coumarin carbamates (compounds **Sp(1/2)-CMR**; final concentration: 50 mM in DMSO) and Camptothecin prodrugs (compounds **Sp(1/2)-CPT**; final concentration: 25 mM in DMSO) were added to 25 mM aqueous buffer (devoid or containing phosphatase) according to the following scheme:

|                                      | <b>Sp(1/2)-CMR</b>                                         | <b>Sp(1/2)-CPT</b>                                                              |
|--------------------------------------|------------------------------------------------------------|---------------------------------------------------------------------------------|
| Sample (in DMSO)<br>(Volume % Total) | 5% - [2.5 mM] final                                        | 10% - [2.5 mM] final                                                            |
| Aq. Buffer (Volume % Total)          | 95%                                                        | 90%                                                                             |
| Buffer Type                          | 25 mM Acetate Buffer pH 5.0                                | 25 mM HEPES Buffer pH 7.5 + 0.5 mM Mg <sup>++</sup>                             |
| Phosphatase Type                     | lyophilized Phosphatase, Acid, from potato - [50 µM] final | lyophilized Phosphatase, Alkaline from bovine intestinal mucosa - [50 µM] final |

Immediately after preparation, the mixtures were incubated at 37 °C and aliquots were collected at different time points and diluted 1:10 with a 0.2% TFA solution in MeCN. Diluted aliquots were cooled at -20 °C for at least 0.5 h and then centrifuged at 13000 rpm at 4 °C for 15 min. The supernatant was transferred in glass vials, volatiles were removed under vacuum, and the concentrated DMSO solution was diluted with aqueous buffers for HPLC analysis, according to the following scheme:

|                            | <b>Sp(1/2)-CMR</b>          | <b>Sp(1/2)-CPT</b>                   |
|----------------------------|-----------------------------|--------------------------------------|
| Buffer for HPLC analysis   | H <sub>2</sub> O + 0.2% TFA | 8:2 H <sub>2</sub> O/MeCN + 0.2% TFA |
| Final sample concentration | 1 mM                        | 0.25 mM                              |

The diluted aliquots were subjected to HPLC analysis as described before.

HPLC Data – Coumarin Carbamates

- Sp1-CMR 2.5 mM
- 25 mM acetate buffer + 5% DMSO
- pH 5.0, T: 37 °C

t = 2 h

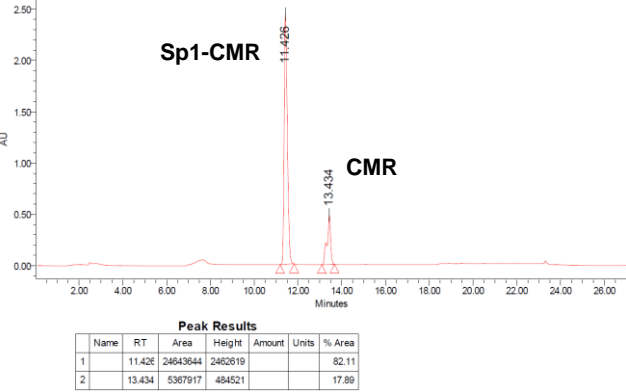

t = 5 h

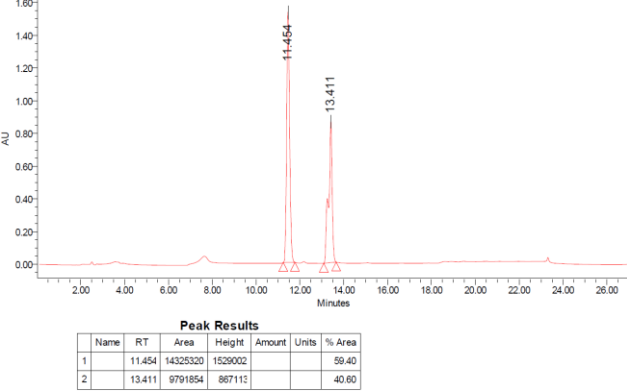

- Sp2-CMR 2.5 mM
- 25 mM acetate buffer + 5% DMSO
- pH 5.0, T: 37 °C

t = 2 h

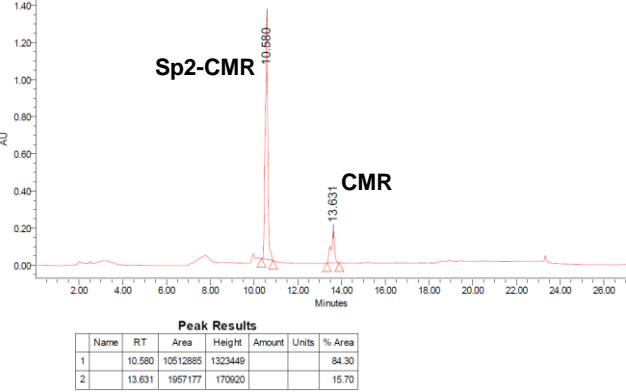

t = 5 h

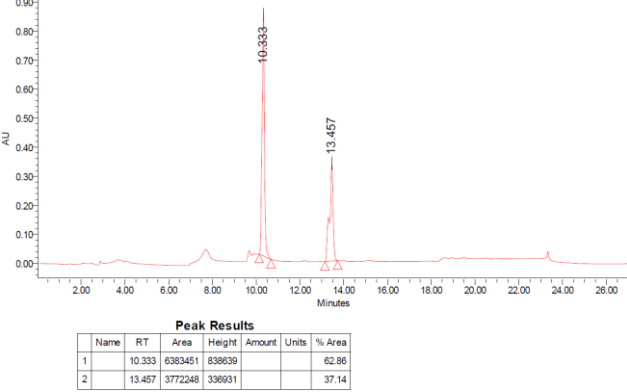

- Sp2-CMR 2.5 mM
- 50 µM phosphatase in 25 mM acetate buffer + 5% DMSO
- pH 5.0, T: 37 °C

t = 2 h

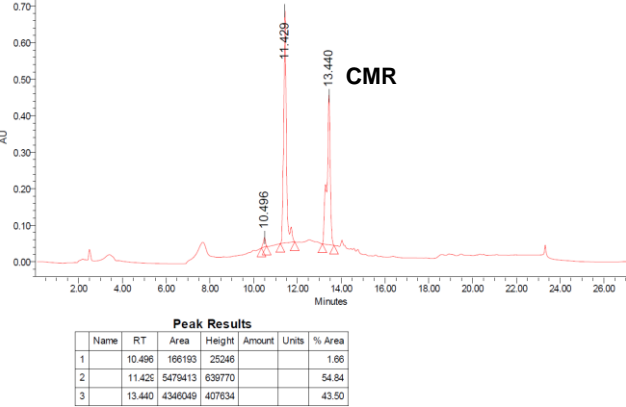

t = 5 h

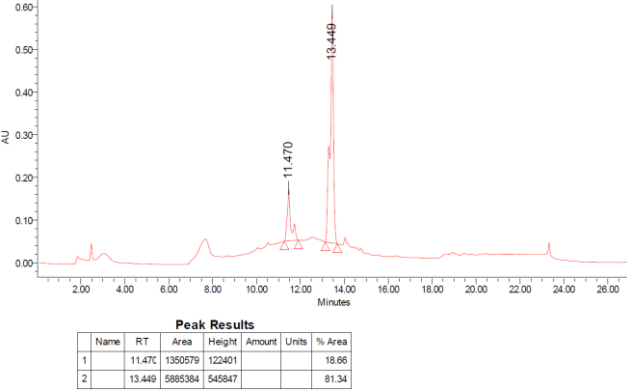

HPLC Data – CPT Prodrugs

- Sp1-CPT 2.5 mM
- 25 mM HEPES Buffer + 0.5 mM Mg<sup>++</sup> + 10% DMSO
- pH 7.5, T: 37 °C

t = 2 h

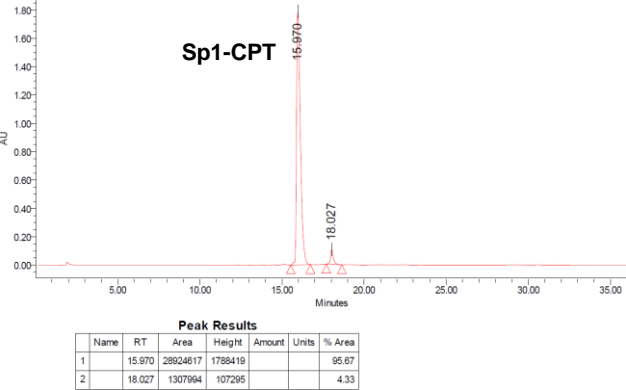

t = 5 h

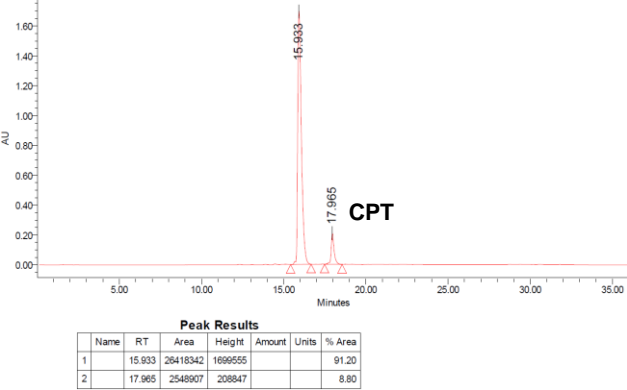

- Sp2-CPT 2.5 mM
- 25 mM HEPES Buffer + 0.5 mM Mg<sup>++</sup> + 10% DMSO
- pH 7.5, T: 37 °C

t = 2 h

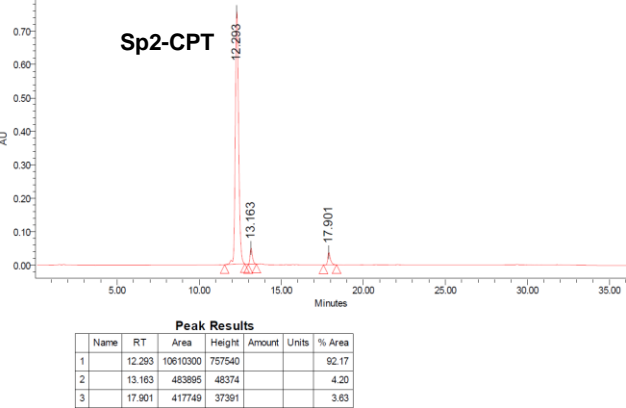

t = 5 h

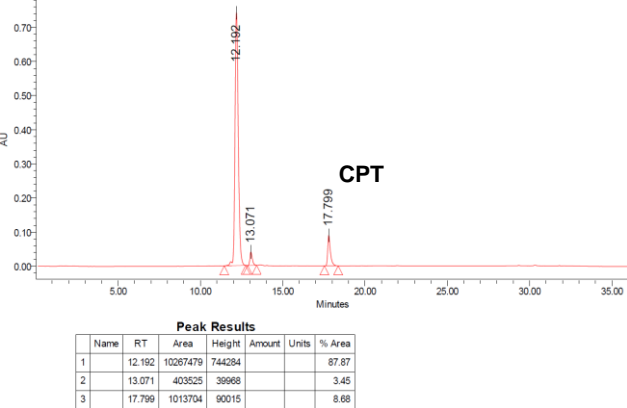

- Sp2-CPT 2.5 mM
- 50 µM phosphatase in 25 mM HEPES Buffer + 0.5 mM Mg<sup>++</sup> + 10% DMSO
- pH 7.5, T: 37 °C

t = 2 h

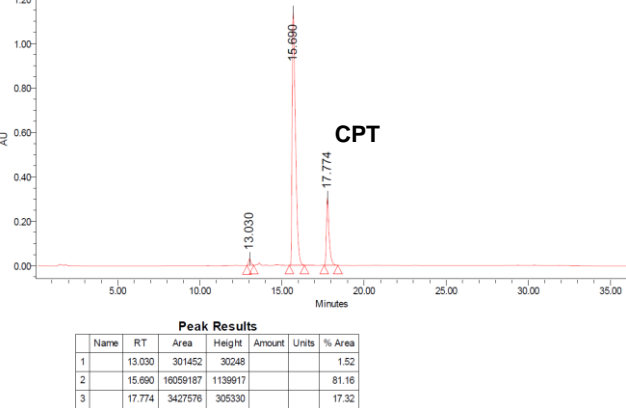

t = 5 h

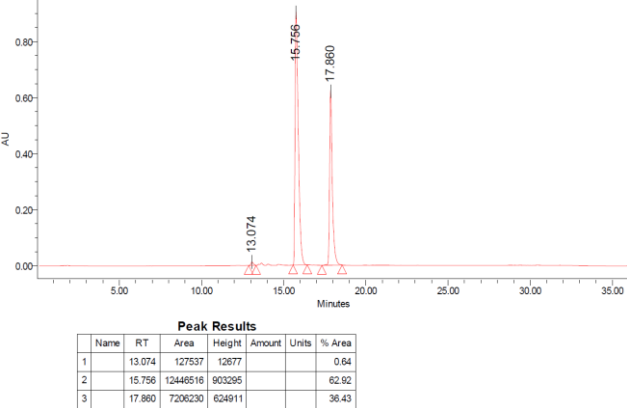

Camptothecin Release from Prodrug 5 in the presence/absence of Phosphatase and Trypsin

## Experimental Procedure

The following stock solutions were prepared:

|              |                                                                                                                                           |
|--------------|-------------------------------------------------------------------------------------------------------------------------------------------|
| <b>5</b>     | Lyophilized <b>5</b> dissolved in DMSO at 20 mM concentration                                                                             |
| HEPES Buffer | 25 mM HEPES Buffer pH 7.5 + 0.5 mM Mg <sup>++</sup>                                                                                       |
| Phosphatase  | 1 mg of lyophilized Phosphatase, Alkaline from bovine intestinal mucosa (Sigma-Aldrich) dissolved in 78 µl of HEPES Buffer. [80 µM] final |
| Trypsin      | 1 mg of lyophilized Trypsin from porcine pancreas (Sigma-Aldrich) dissolved in 525 µl of HEPES Buffer. [80 µM] final                      |

The solutions were mixed according to the following scheme:

|                                         |                                                                                                                                                                                                                                                                                     |
|-----------------------------------------|-------------------------------------------------------------------------------------------------------------------------------------------------------------------------------------------------------------------------------------------------------------------------------------|
| <b>Entry 0)</b> No Enzyme               | <ul style="list-style-type: none"> <li>• <b>5</b> (10% volume, [2 mM] final)</li> <li>• HEPES Buffer (90% volume)</li> </ul>                                                                                                                                                        |
| <b>Entry I)</b> Phosphatase only        | <ul style="list-style-type: none"> <li>• <b>5</b> (10% volume, [2 mM] final)</li> <li>• HEPES Buffer (33% volume)</li> <li>• Phosphatase (45% volume, [0.04 mM] final)</li> <li>• MeCN (12% volume, added to prevent precipitation of dephosphorylated prodrug <b>6</b>)</li> </ul> |
| <b>Entry II)</b> Trypsin only           | <ul style="list-style-type: none"> <li>• <b>5</b> (10% volume, [2 mM] final)</li> <li>• HEPES Buffer (45% volume)</li> <li>• Trypsin (45% volume, [0.04 mM] final)</li> </ul>                                                                                                       |
| <b>Entry III)</b> Phosphatase + Trypsin | <ul style="list-style-type: none"> <li>• <b>5</b> (10% volume, [2 mM] final)</li> <li>• Trypsin (45% volume, [0.04 mM] final)</li> <li>• Phosphatase (45% volume, [0.04 mM] final)</li> </ul>                                                                                       |

Immediately after preparation, entry **0** was diluted with 8:2 H<sub>2</sub>O/MeCN + 0.2% TFA mixture up to 0.25 mM concentration of **5** (sample used as reference for HPLC analysis). Samples of entries **I**, **II** and **III** were incubated at 37 °C. After 5 h, the samples were diluted 1:10 with a 0.2% TFA solution in MeCN. Diluted aliquots were cooled to -20 °C for at least 0.5 h and then centrifuged at 13000 rpm at 4 °C for 15 min. The supernatant was transferred in glass vials, volatiles were removed under vacuum, and the concentrated DMSO solution was diluted with 8:2 H<sub>2</sub>O/MeCN + 0.2% TFA mixture up to 0.25 mM concentration of initial substrate **5**. The diluted aliquots were subjected to HPLC-MS analysis (Data shown in Figure 3B and Figure S1-S2). The stability of **5** in the absence of enzymes was confirmed in an independent experiment, where a 2 mM solution of **5** in 25 mM HEPES Buffer (pH 7.5 + 0.5 mM Mg<sup>++</sup>) was incubated at 37 °C and then analyzed by HPLC.

## Cell Growth Inhibition Assays

### Experimental Procedure

The human ovarian carcinoma cell lines IGROV-1 was cultured in RPMI-1640 medium (Lonza, Basel, Switzerland), supplemented with 10% Fetal Bovine Serum (FBS, Gibco Life Technologies, Carlsbad, California). Cells were thawed from frozen stocks and cultured for no more than 20 passages. CPT and all compounds were diluted in water. Cell sensitivity to compounds was measured by growth inhibition assays, evaluated in keeping with cell pharmacology guidelines.<sup>5</sup> Twenty-four hours after seeding, cells were exposed to serial dilutions of the tested compounds according to different schedules of treatments (72 h *in continuo* or 24 h following cell washout and incubation with fresh RPMI-1640 medium for 48 h). For cell growth inhibition assays in the presence of phosphatase, cells were in medium added with 100 nM concentration of alkaline phosphatase (Sigma-Aldrich, dissolved in 25 mM HEPES Buffer pH 7.5 + 0.5 mM Mg<sup>++</sup>) while exposed to serial dilutions of prodrug **5**. Cells were counted with a cell counter 72 h after treatment start. IC<sub>50</sub> is defined as the drug concentration producing 50% decrease of cell growth.

---

<sup>5</sup> P. Perego, G. Hempel, S. Linder, T. D. Bradshaw, A. K. Larsen, G. J. Peters, R. M. Phillips, *Cancer Chemother. Pharmacol.* 2018, **81**, 427.



## Supplementary Figures

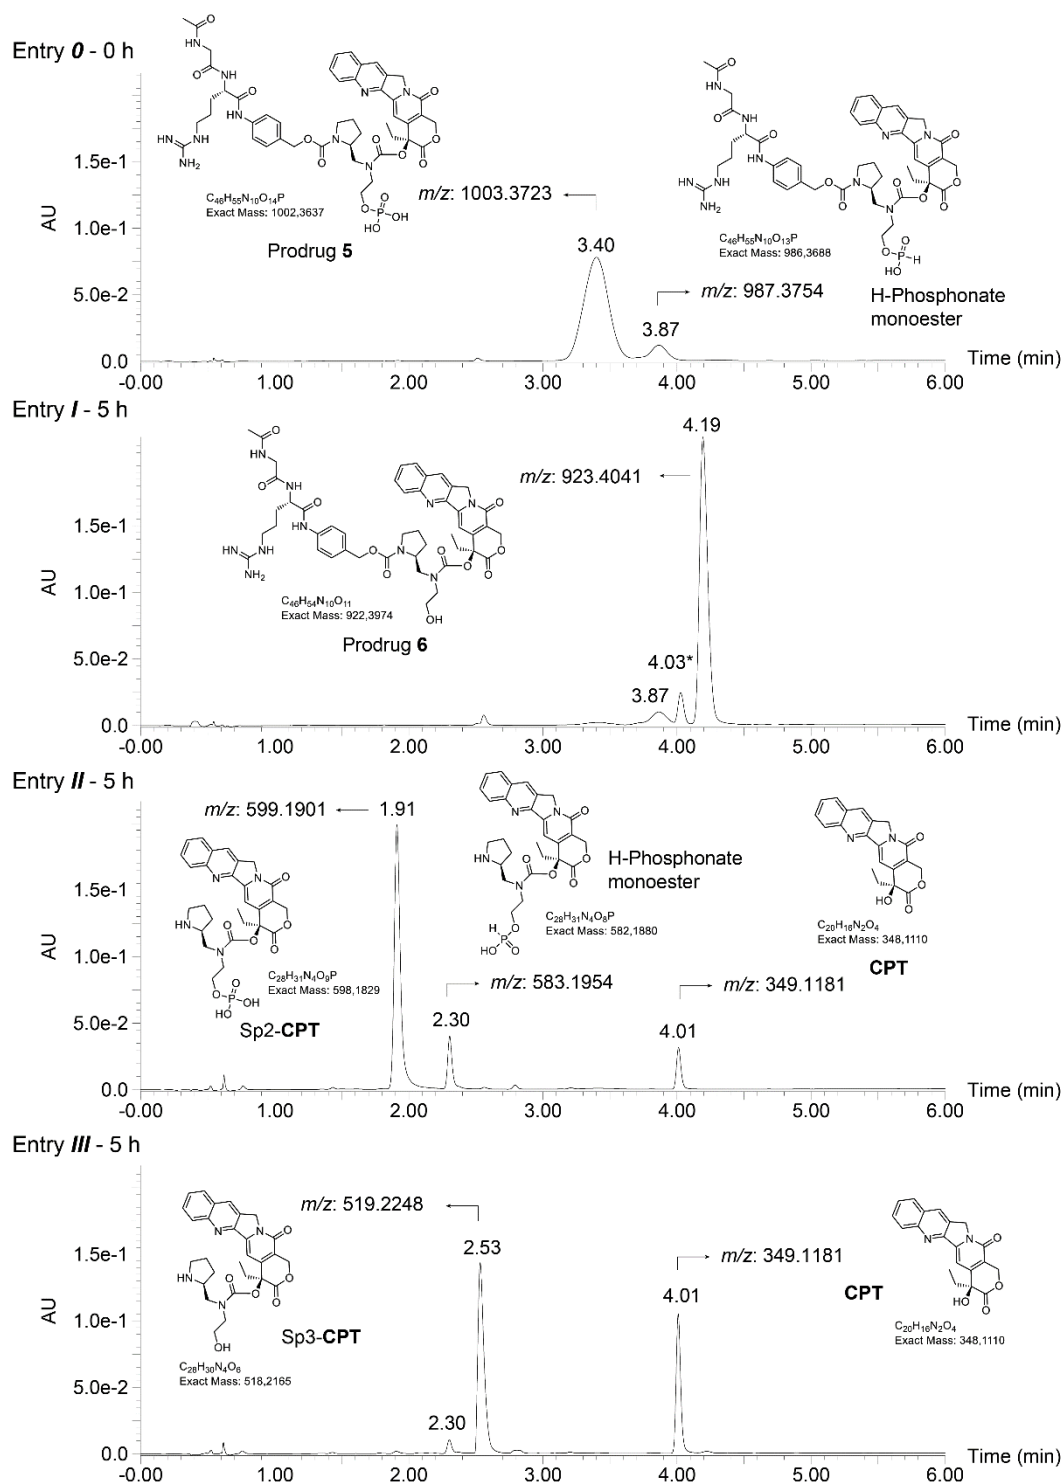

**Figure S1.** Assigned HPLC peaks relative to the analysis of prodrug **5** (2.5 mM in HEPES buffer at pH 7.5) at  $t = 0$  (entry **0**) and upon 5 h incubation at 37 °C with 50 mM alkaline phosphatase (entry **I**), 50  $\mu$ M trypsin (entry **II**) or 50  $\mu$ M alkaline phosphatase + 50  $\mu$ M trypsin (entry **III**). This analysis highlighted the presence of ca. 10% impurity in the batch of **5**, characterized by a molecular ion  $M(5)$ -16 Da (see UV peak at  $r.t.$  = 3.87 in Figure S1, entry **0**). This impurity was interpreted as the H-phosphonate analogue of **5**, accounting for an incomplete oxidation of the *tert*-butyl phosphite intermediate during the synthesis. \* Not assigned.

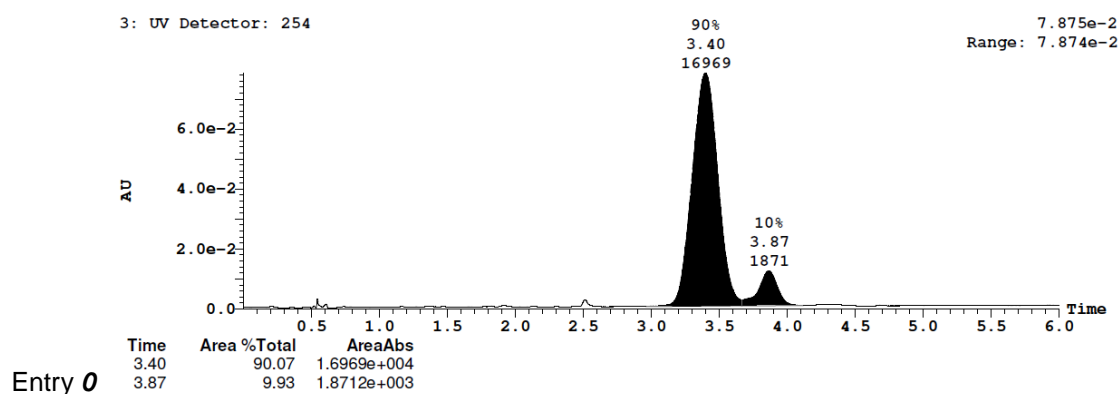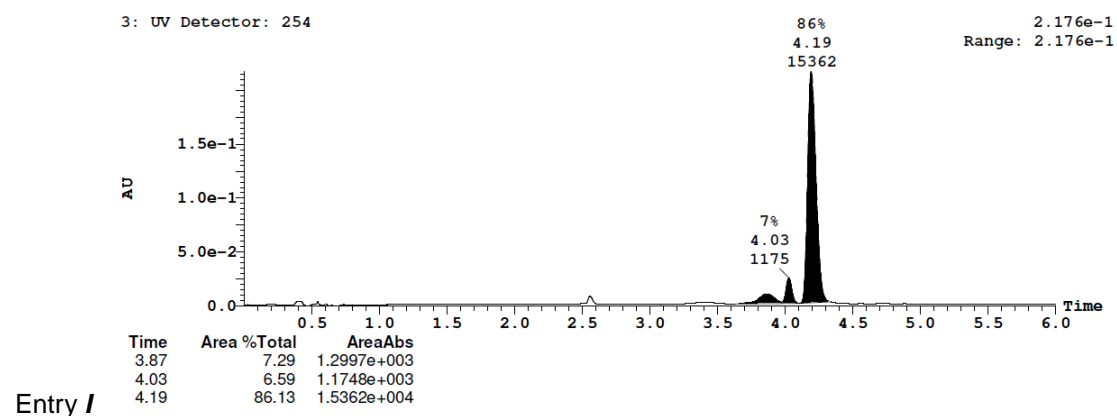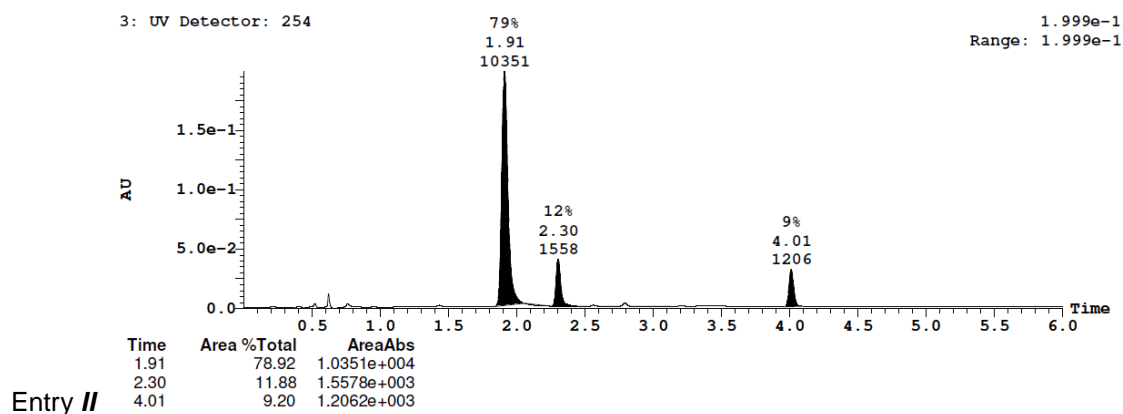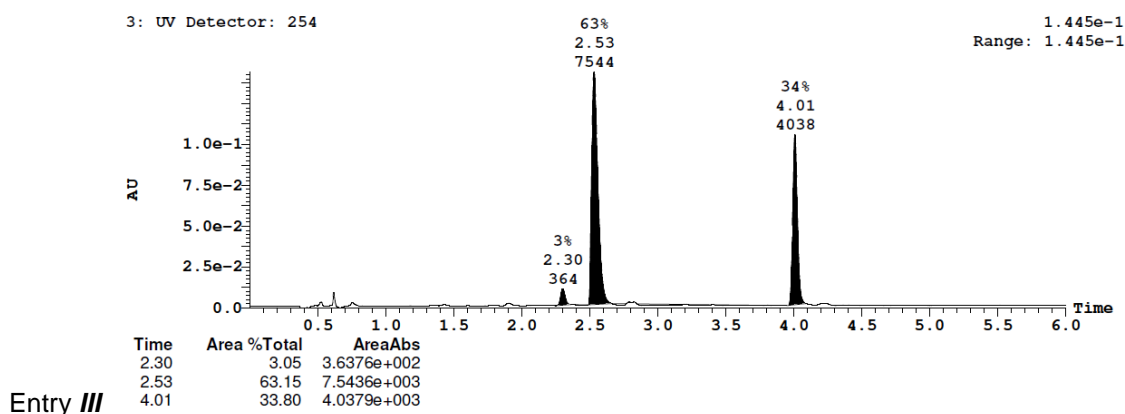

Figure S2. HPLC peaks integrals relative to the stability analysis of prodrug 5 (see Figure S1).

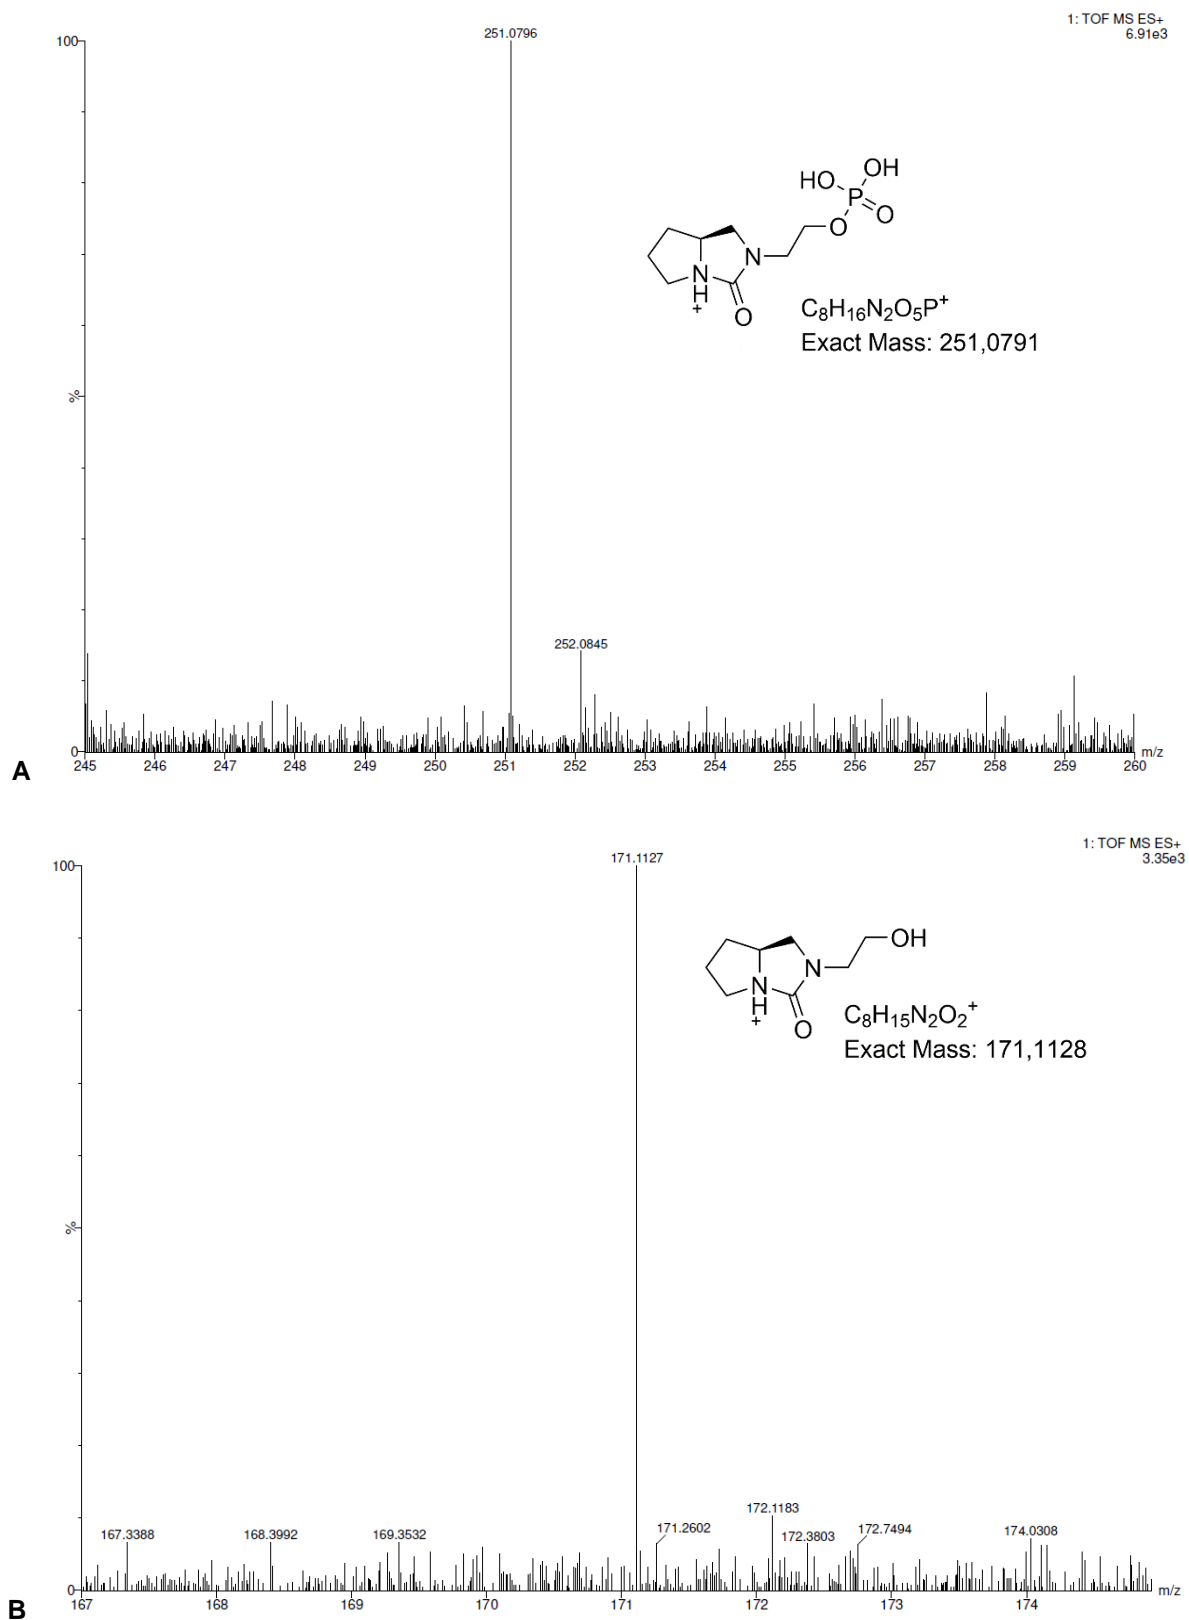

**Figure S3.** MS spectra of cyclic urea products derived from the cyclization of the **Sp2** (A) and **Sp3** (B) SI spacers, as detected from the HPLC-MS stability analysis of prodrug **5**. A and B spectra were detected during the analysis of entry **II** and **III**, respectively (see Figure S1).

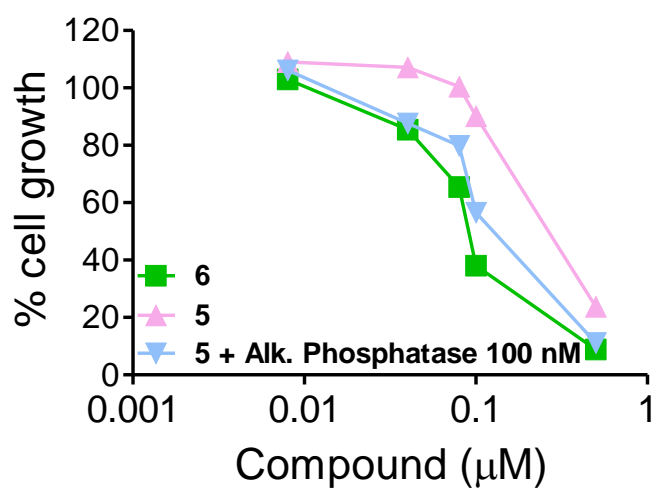

| Compound                                  | IC <sub>50</sub> (nM) <sup>[a]</sup> |
|-------------------------------------------|--------------------------------------|
| Prodrug 5                                 | 264                                  |
| Prodrug 6                                 | 90                                   |
| Prodrug 5<br>+ 100 nM Akaline phosphatase | 125                                  |

**Figure S4.** Cell growth-inhibition assays of IGROV-1 cells upon incubation with prodrug **5** (with or w/o phosphatase) and **6**. IC<sub>50</sub> values are reported in the Table. Graph and Table report the mean of duplicate data from a single representative experiment. [a] Cells were incubated for 24 h with serial dilutions of prodrugs **5-6**, followed by cell washout and incubation for additional 48 h in fresh medium.

## Appendix

### NMR Spectra

#### Sp1-CMR

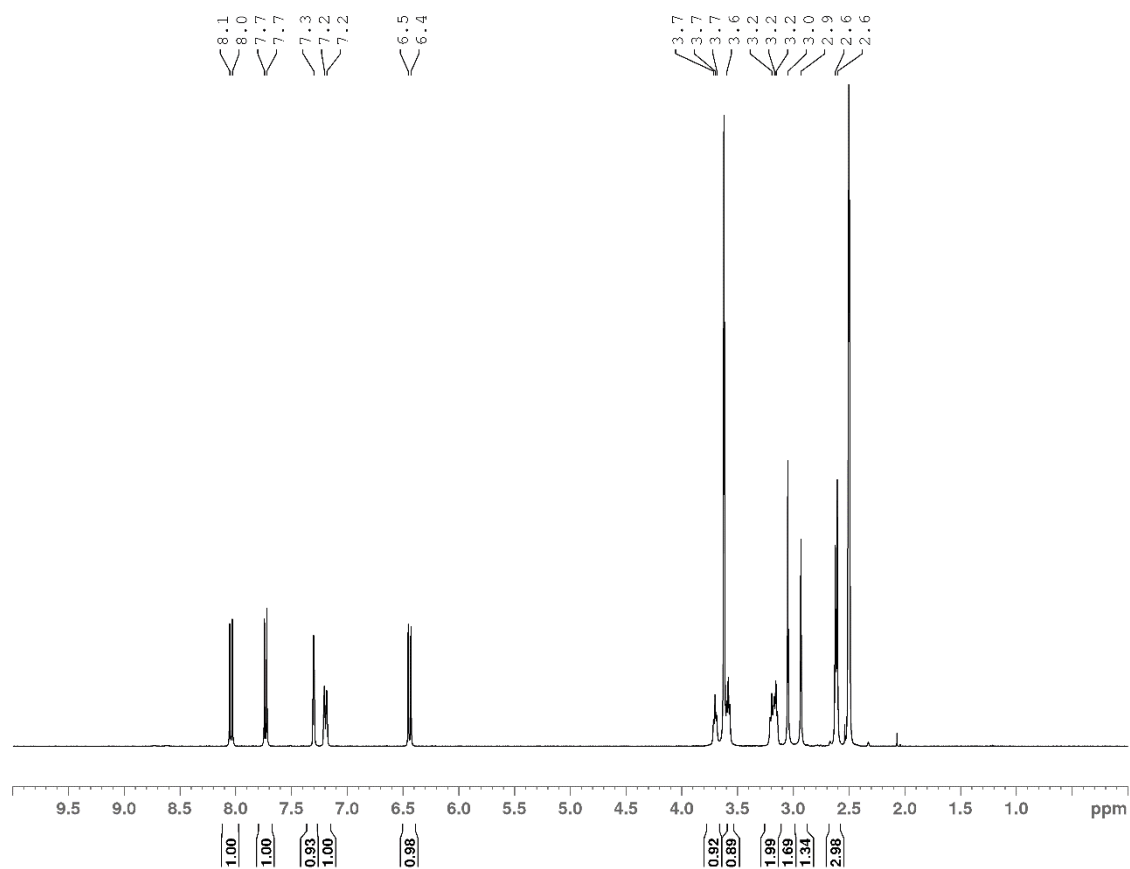

*Boc-Pro-OH* (**10**)

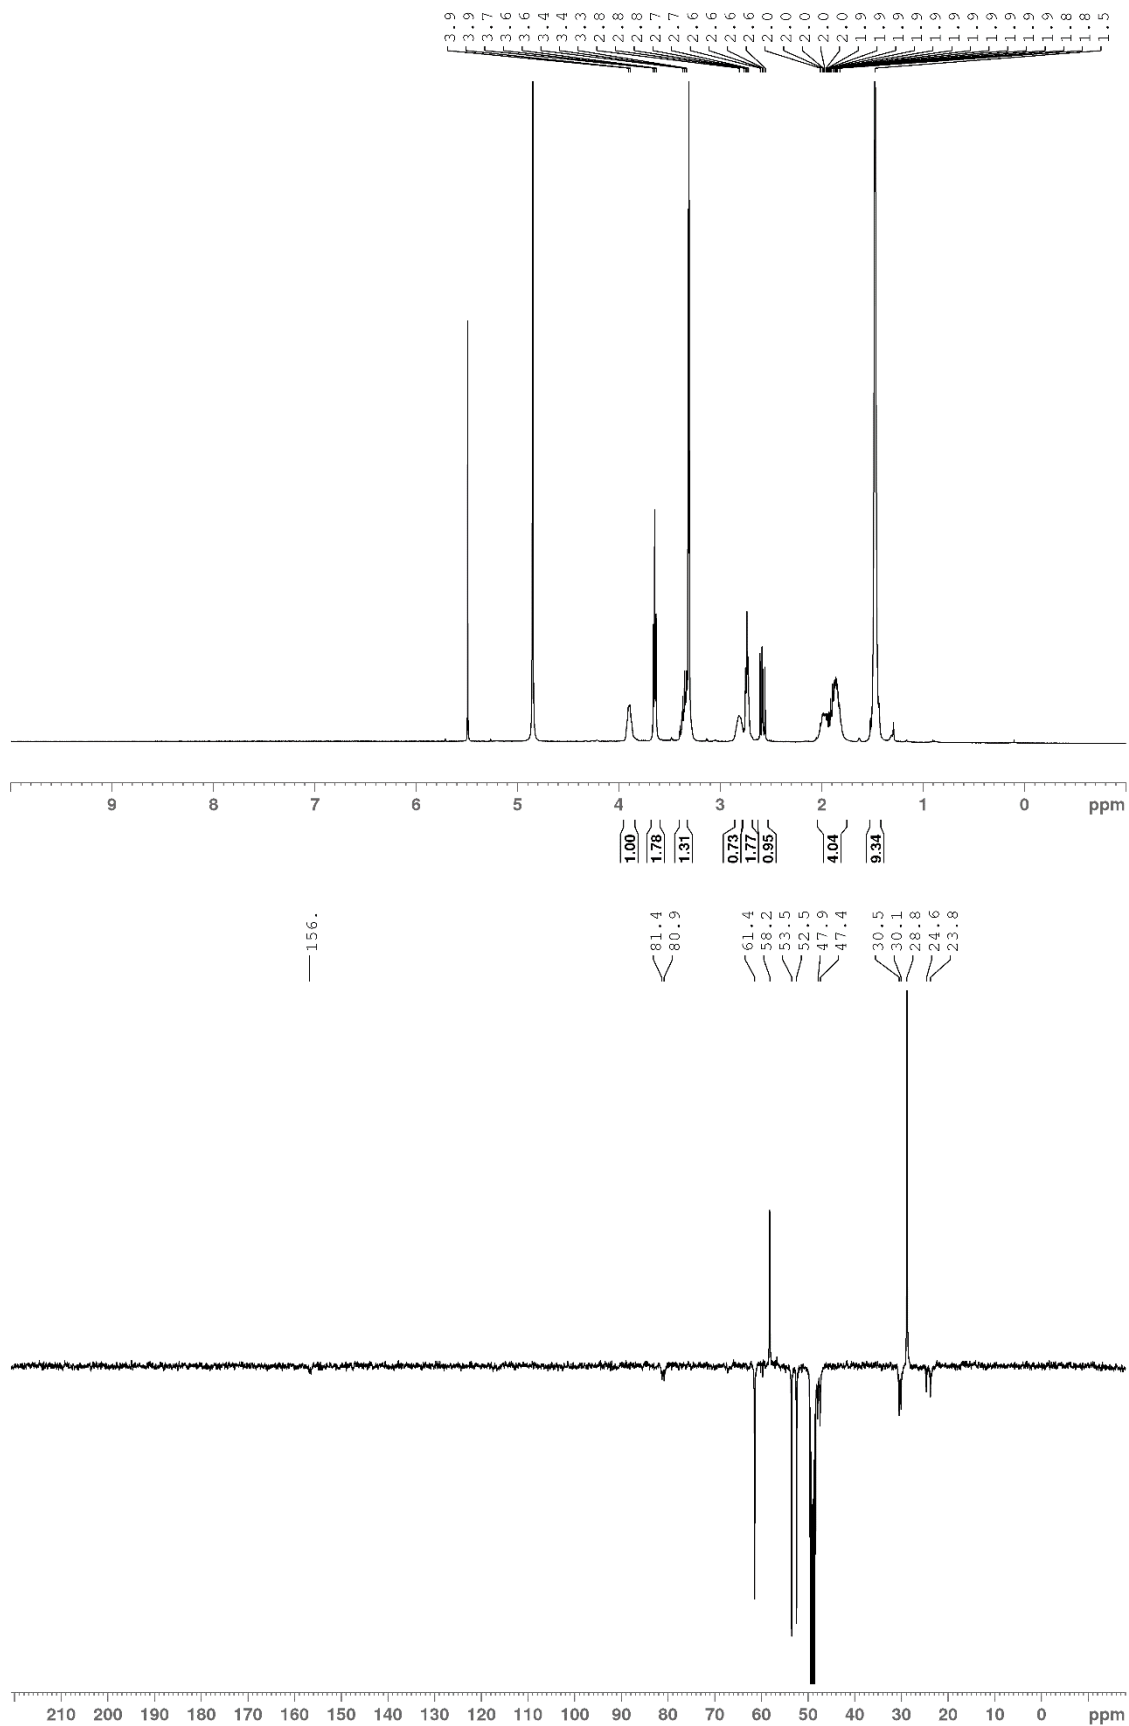

*Boc-Sp3-CMR* (**11**)

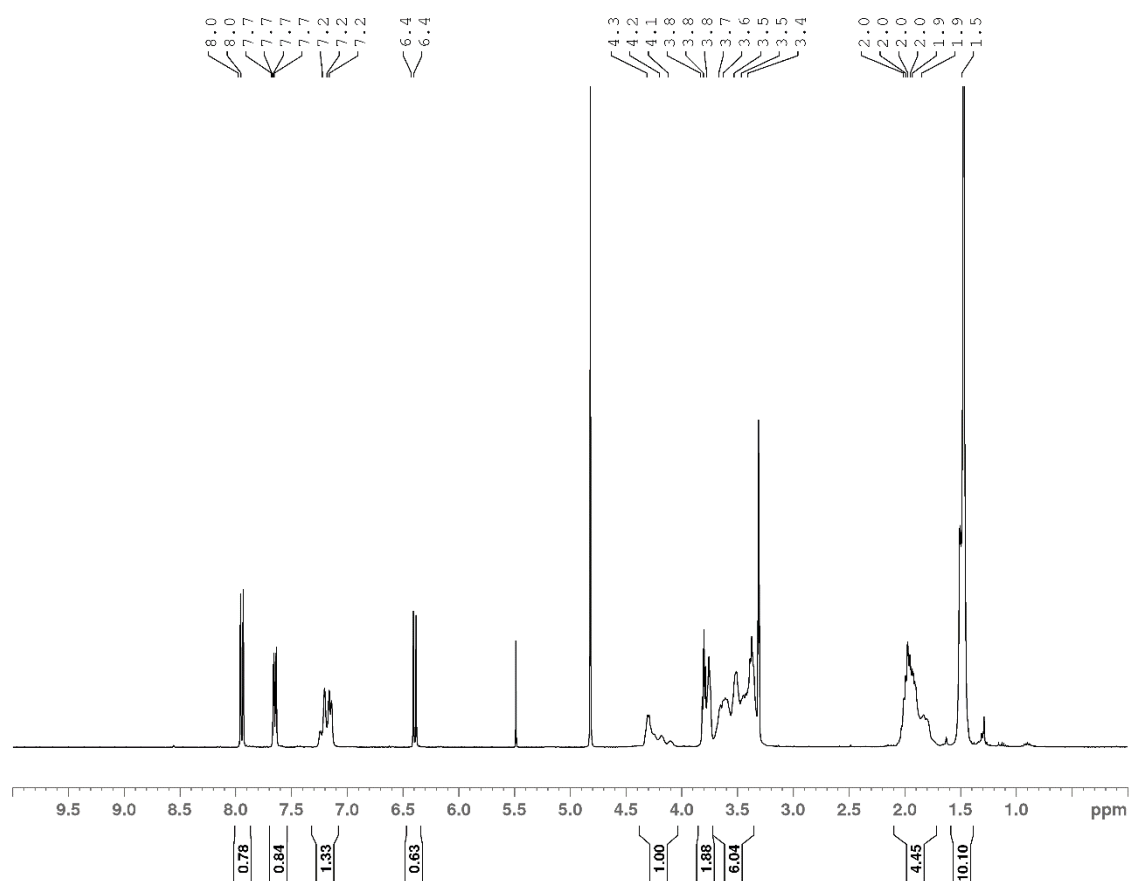

Ac-Gly-Arg(Pbf)-PABOH (**14**)

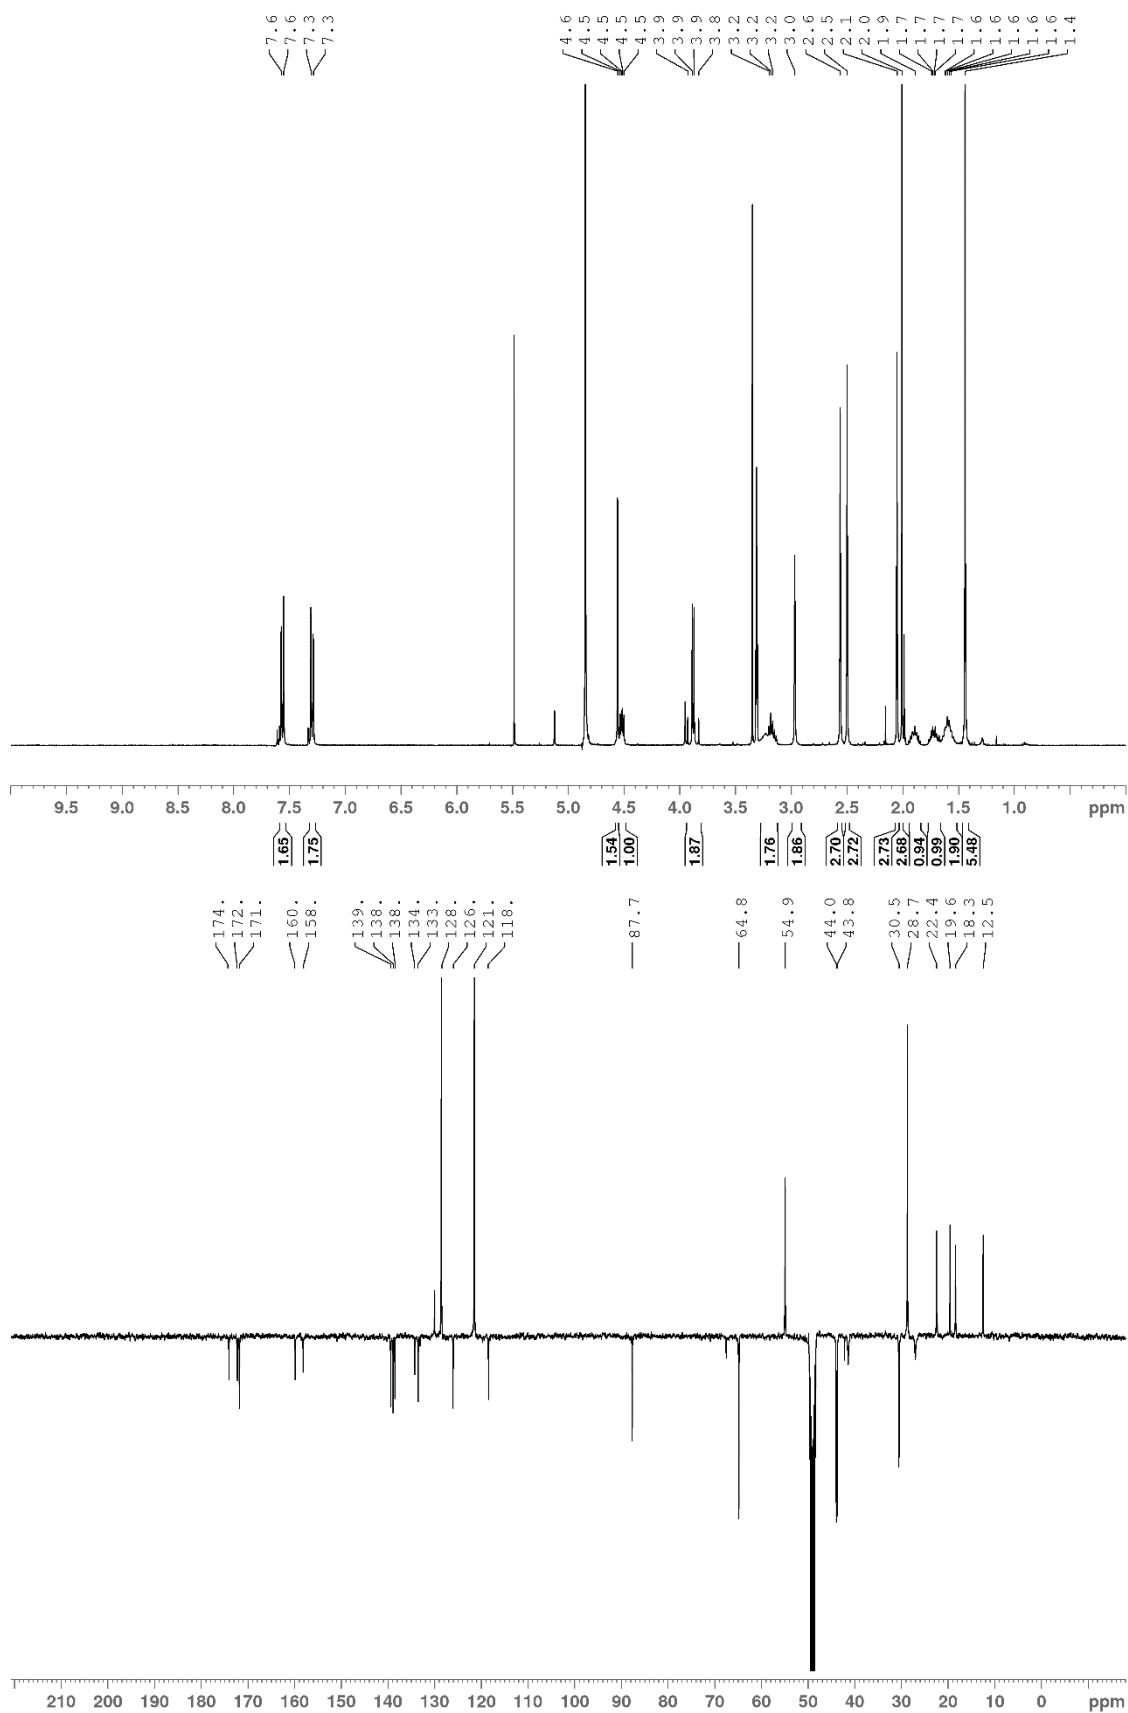



Ac-Gly-Arg(Pbf)-PAB-PNP (15)

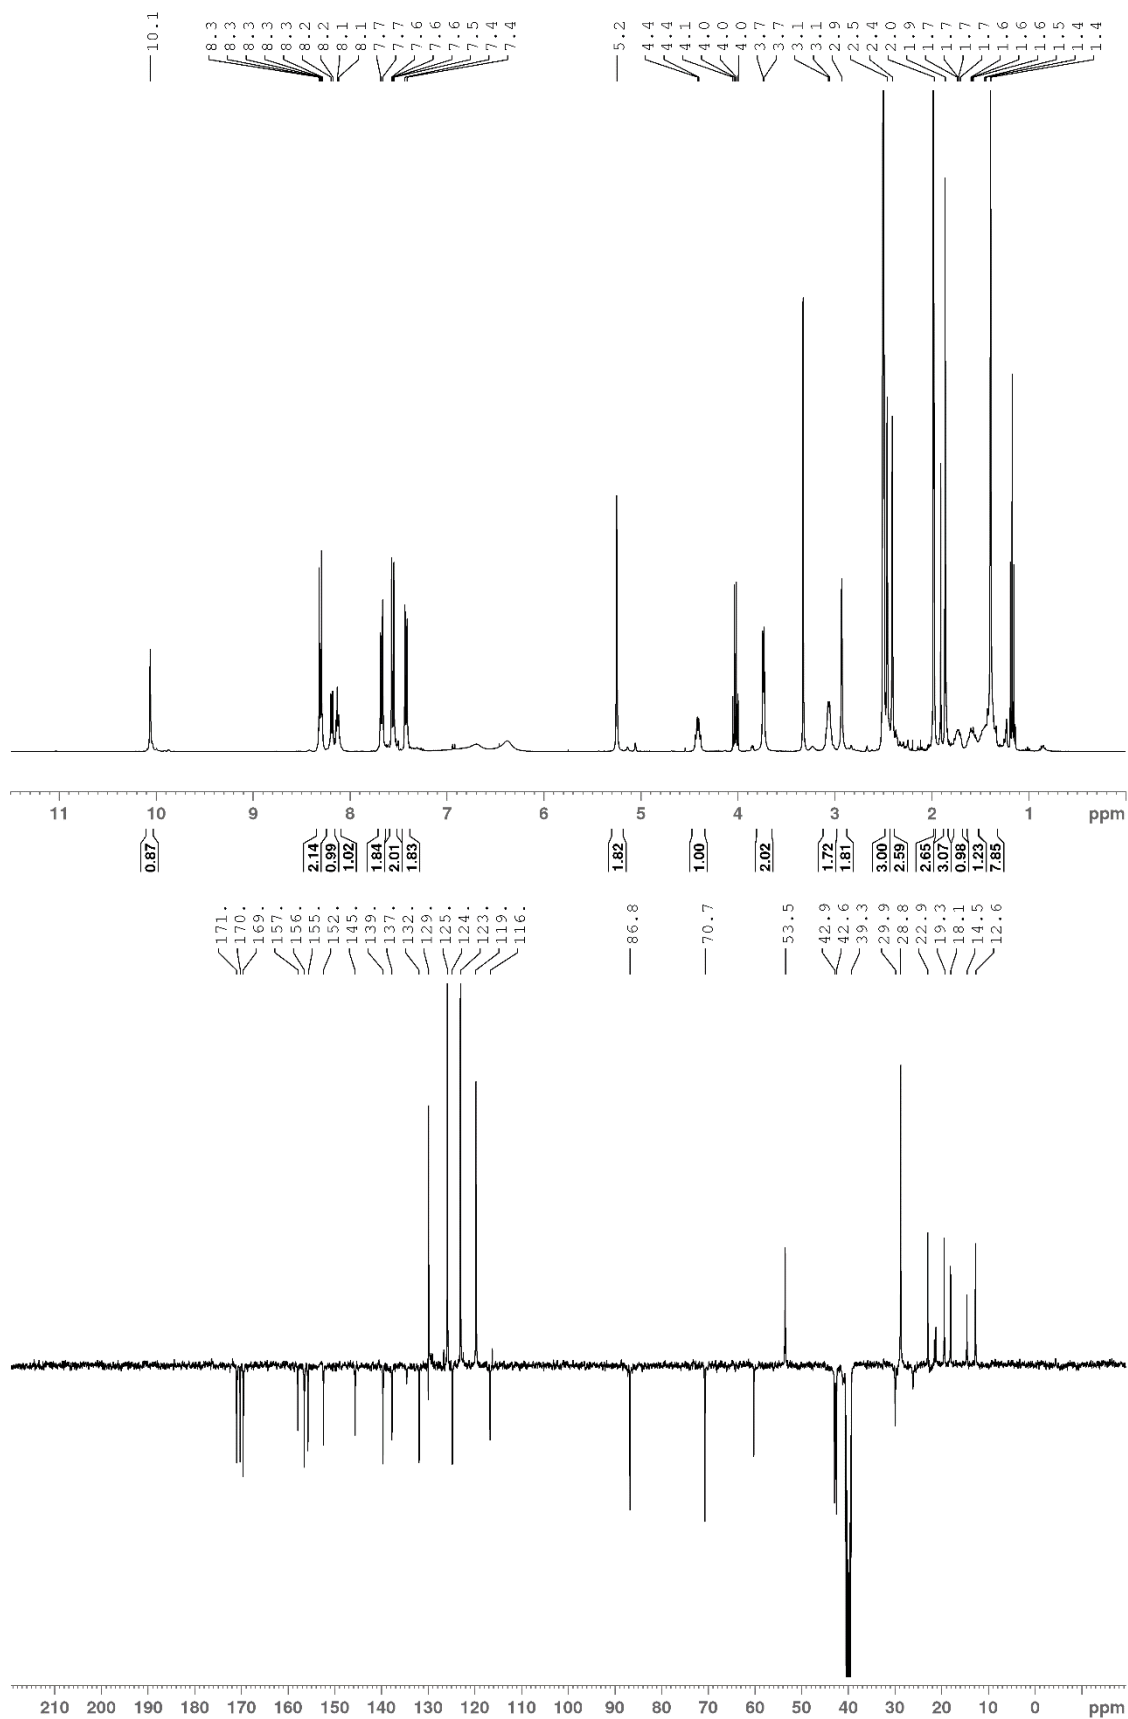

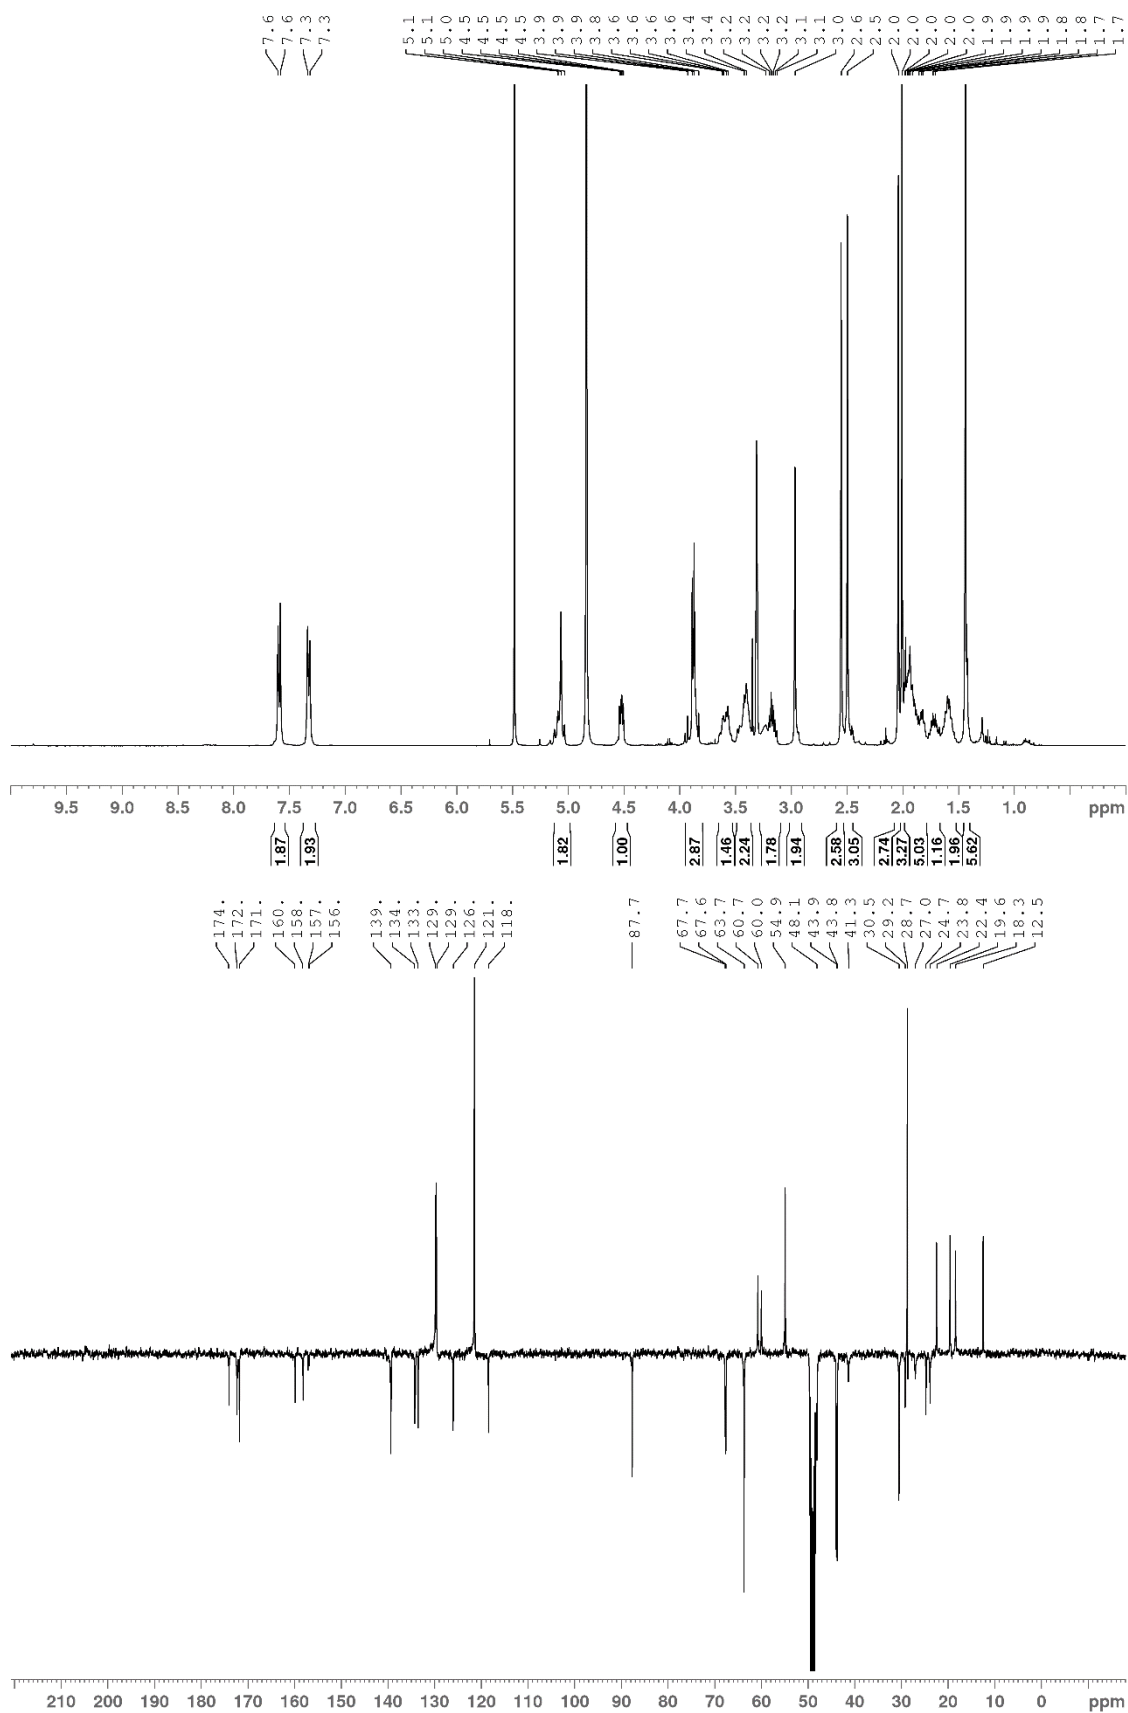

Ac-Gly-Arg(Pbf)-PABC-Pro-Ethanolamine Acetate (**18**)

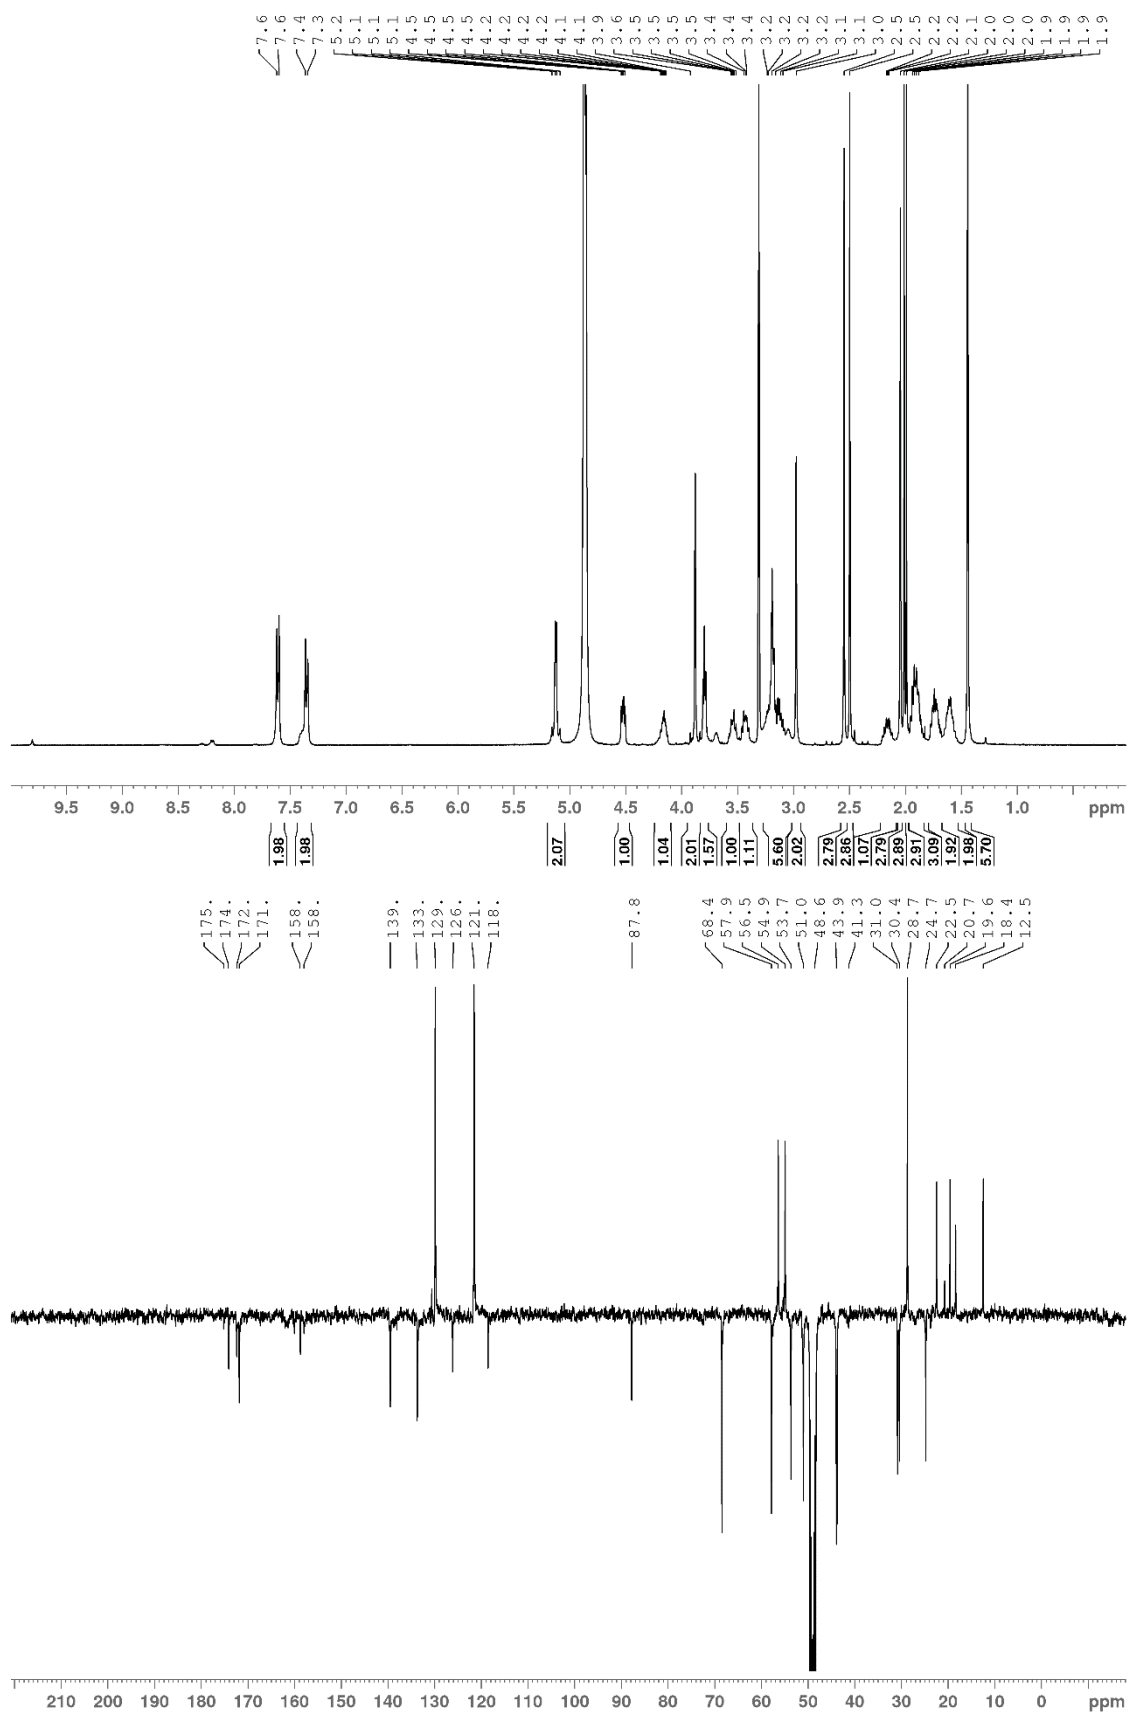

Ac-Gly-Arg(Pbf)-PABC-Pro(OH)-CPT (19)

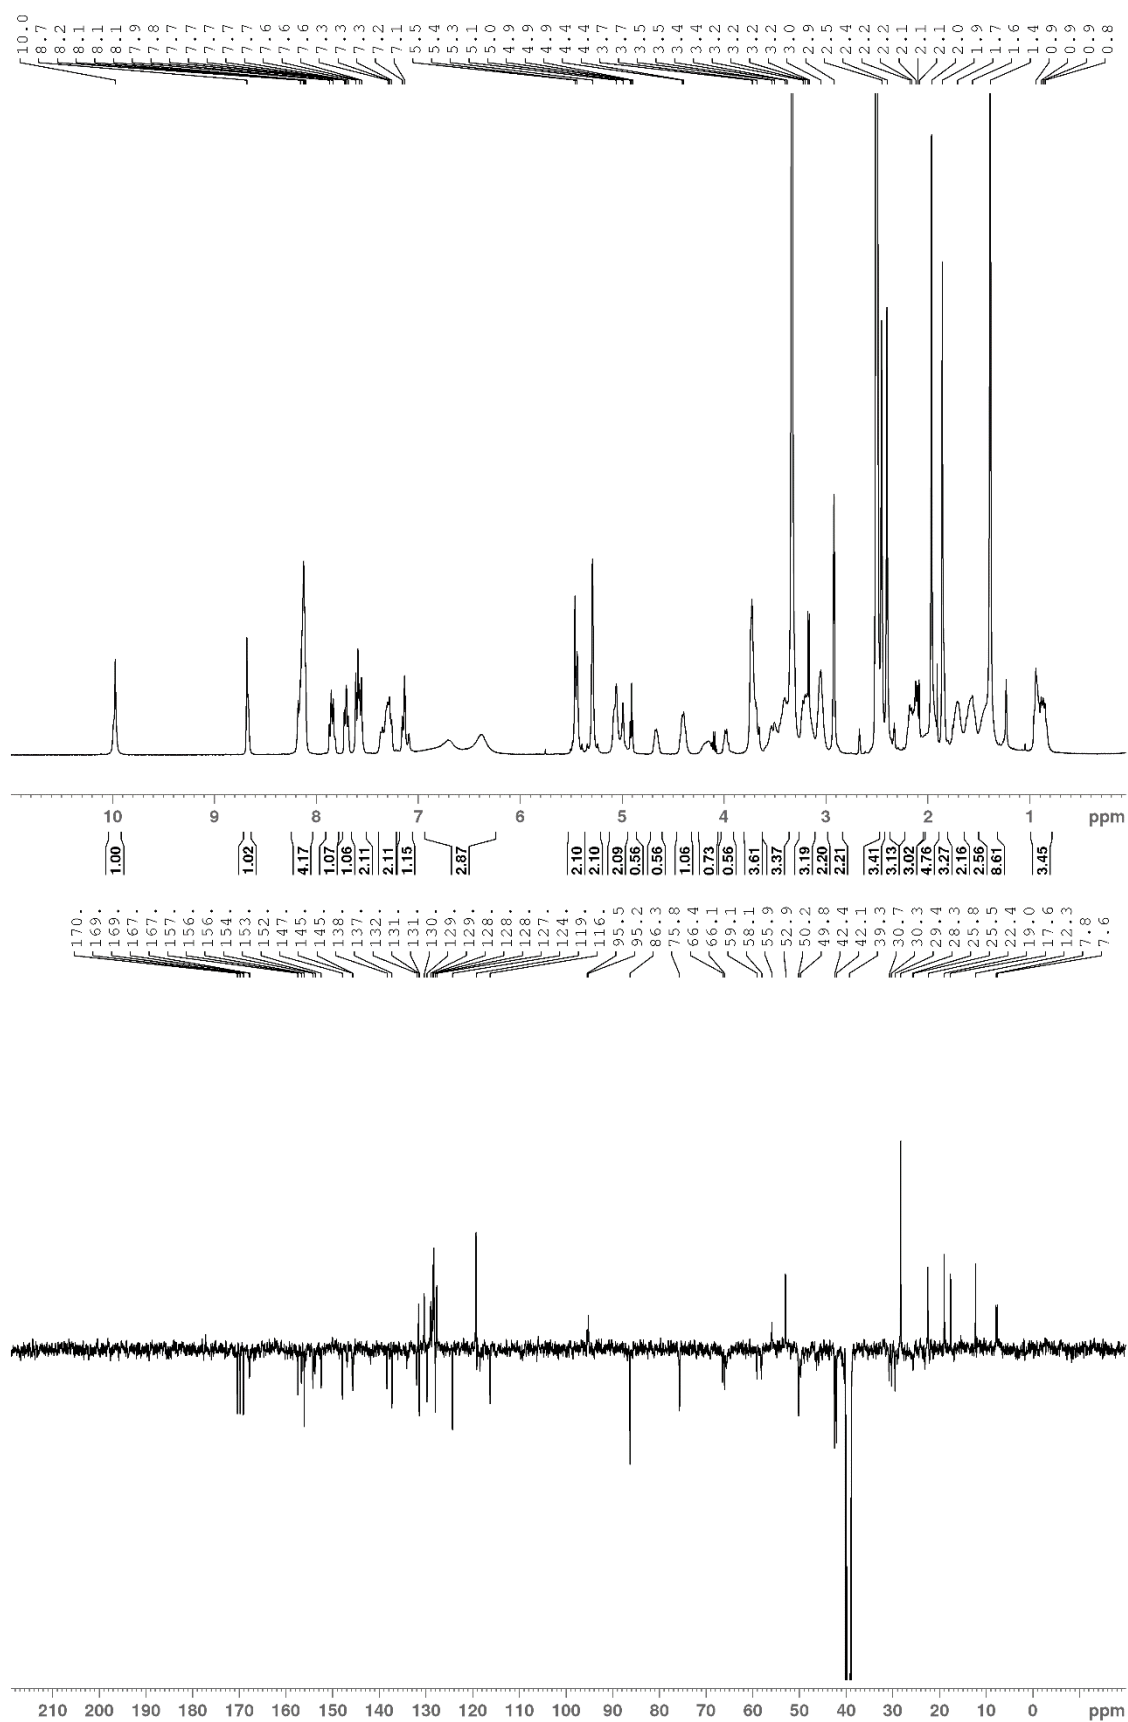

## HPLC traces of purified prodrugs 5 and 6

*Ac-Gly-Arg-PABC-Pro(OPO<sub>3</sub>H<sub>2</sub>)-CPT (5, 254 nm)*

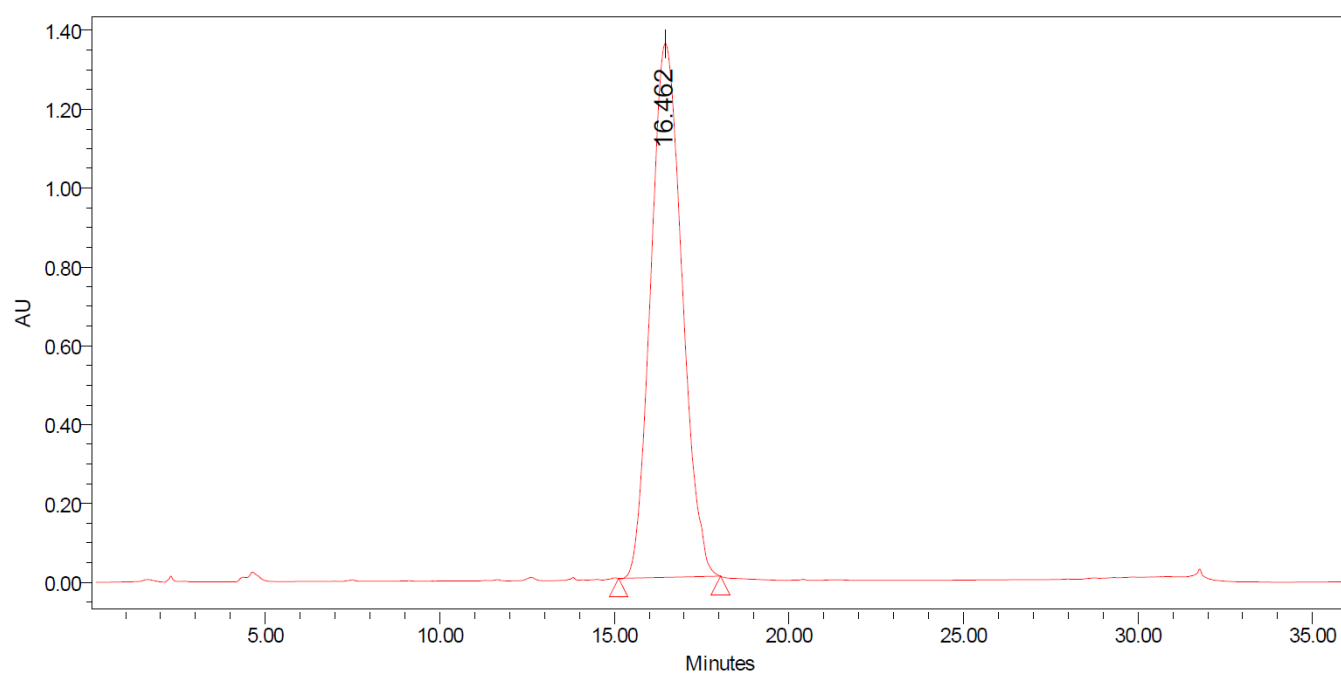

*Ac-Gly-Arg-PABC-Pro(OH)-CPT (6, 254 nm)*

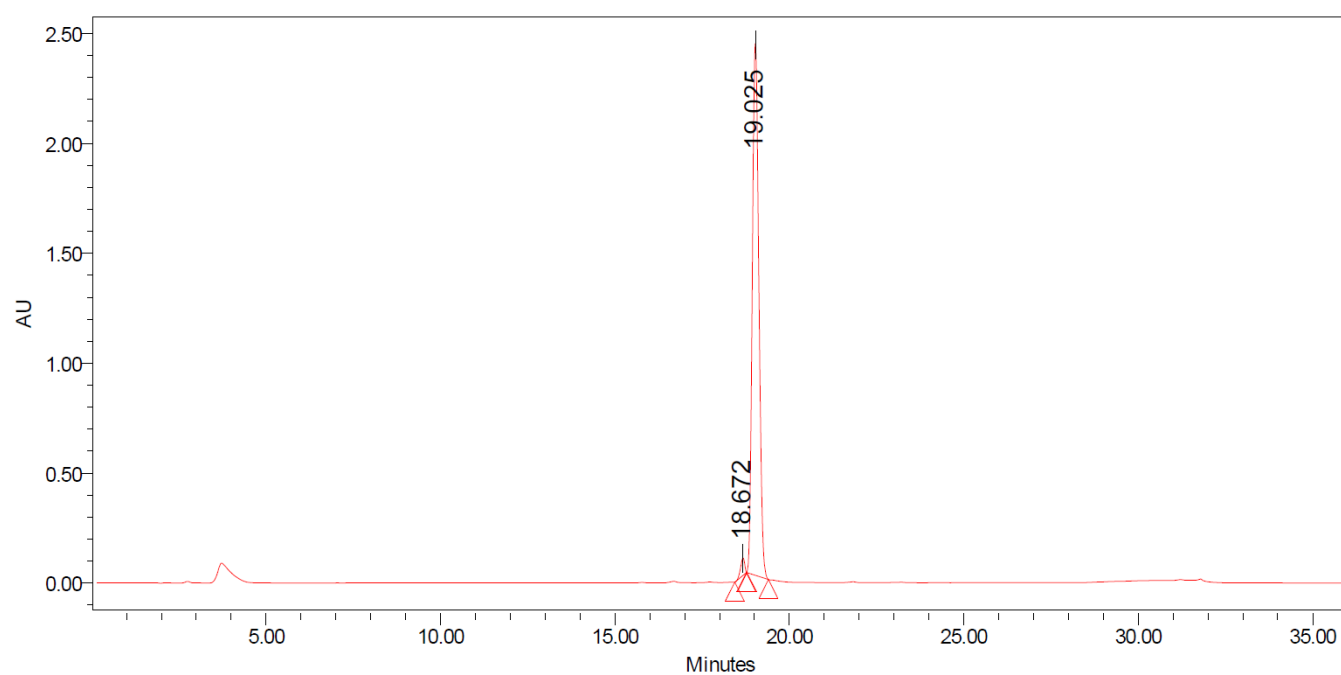

Supplement: d1cc02895b1.pdf [file d1cc02895b1.pdf]
